# Supplementary material for: Social media use and adolescent sleep patterns: cross-sectional findings from the UK millennium cohort study
Source: PubMed Central journal article supplement (PMC6830469; doi:10.1136/bmjopen-2019-031161), 2019-10-22
Supplement: bmjopen-2019-031161.draft_revisions.pdf [file bmjopen-2019-031161.draft_revisions.pdf]

# BMJ Open

BMJ Open is committed to open peer review. As part of this commitment we make the peer review history of every article we publish publicly available.

When an article is published we post the peer reviewers' comments and the authors' responses online. We also post the versions of the paper that were used during peer review. These are the versions that the peer review comments apply to.

The versions of the paper that follow are the versions that were submitted during the peer review process. They are not the versions of record or the final published versions. They should not be cited or distributed as the published version of this manuscript.

BMJ Open is an open access journal and the full, final, typeset and author-corrected version of record of the manuscript is available on our site with no access controls, subscription charges or pay-per-view fees (<http://bmjopen.bmj.com>).

If you have any questions on BMJ Open's open peer review process please email [info.bmjopen@bmj.com](mailto:info.bmjopen@bmj.com)

# BMJ Open

## Social media use and adolescent sleep outcomes: cross-sectional findings from the UK Millennium Cohort Study

|                               |                                                                                                                                                                                      |
|-------------------------------|--------------------------------------------------------------------------------------------------------------------------------------------------------------------------------------|
| Journal:                      | <i>BMJ Open</i>                                                                                                                                                                      |
| Manuscript ID                 | bmjopen-2019-031161                                                                                                                                                                  |
| Article Type:                 | Research                                                                                                                                                                             |
| Date Submitted by the Author: | 23-Apr-2019                                                                                                                                                                          |
| Complete List of Authors:     | Scott, Holly; University of Glasgow, School of Psychology<br>Biello, Stephany; University of Glasgow, School of Psychology<br>Woods, HC; University of Glasgow, School of Psychology |
| Keywords:                     | Social media use, Sleep, Adolescents, Delayed bedtime, Sleep quality, Screen time                                                                                                    |
|                               |                                                                                                                                                                                      |

SCHOLARONE™  
Manuscripts

1  
2  
3 **TITLE PAGE**  
4

5 **Title**

6  
7 Social media use and adolescent sleep patterns: cross-sectional findings from the UK  
8  
9 Millennium Cohort Study  
10

11  
12 **Author names**  
13

14 Holly Scott, MSc; Stephany M Biello, PhD; Heather Cleland Woods, PhD  
15  
16

17 **Author job titles & affiliation address**  
18

19 Holly Scott, PhD candidate

20  
21 Stephany M Biello, Professor & Depute Head of School

22  
23 Heather Cleland Woods, Lecturer  
24  
25

26 All authors have same institutional affiliation/address:

27  
28 School of Psychology, University of Glasgow, 62 Hillhead Street, Glasgow, G12 8QB.  
29  
30

31 **Corresponding author**  
32

33 Holly Scott, h.scott.1@research.gla.ac.uk, postal address as above.  
34  
35  
36  
37  
38  
39  
40  
41  
42  
43  
44  
45  
46  
47  
48  
49  
50  
51  
52  
53  
54  
55  
56  
57  
58  
59  
60

## ABSTRACT

### Objectives

This study examines associations between social media use and multiple sleep parameters in a large representative adolescent sample. It aims to establish a normative profile of social media use amongst UK adolescents, and quantify associated sleep patterns for higher users relative to average users, controlling for a wide range of covariates.

### Design

The authors used cross-sectional data from the Millennium Cohort Study, a large nationally representative UK birth cohort study.

### Participants

Data from 11,872 adolescents (aged 13-15 years) were used in analyses.

### Methods

Six self-reported sleep parameters captured both sleep timing and quality: sleep onset and wake times (on school days and free days), sleep onset latency (time taken to fall asleep) and trouble falling back asleep after nighttime awakening. Binomial logistic regressions investigated associations between daily social media use and each sleep parameter, controlling for a range of relevant sociodemographic, health and lifestyle covariates.

### Results

Overall, heavier social media use was associated with poorer sleep patterns, controlling for covariates. Very high social media users (at least 5h per day, 20.8%) were more likely than comparable average users (1 to <3h per day, 31.6%) to report late sleep onset (OR = 2.14, 95% CI: 1.83 to 2.50) and wake times (OR = 1.97, 95% CI: 1.32 to 2.93) on school days, and trouble falling back asleep after nighttime awakening (OR = 1.36, 95% CI: 1.10 to 1.66).

### Conclusions

Results indicate statistically and practically significant associations between social media use and sleep patterns, particularly late sleep onset. Interventions can focus on supporting young people to balance online interactions with an appropriate sleep schedule for sufficient sleep on school nights. Future research should explore the context and experience of social media use, to inform meaningful discussions on updating sleep education and interventions to meet the needs of today's society.

## STRENGTHS AND LIMITATIONS

- Provides a current normative profile of social media use and sleep in UK adolescents
- Moves beyond generic “screen time” to examine social media specifically
- Uses data from a large representative sample, including comprehensive covariates
- Uses self-reported measures of social media use and sleep patterns
- Measures only duration of social media use, rather than content and context

## INTRODUCTION

There is significant current attention towards the possible impact of screentime and social media on our adolescents' health. However, the lack of empirical evidence to support policy and practice development in this area has been consistently voiced by clinicians and researchers. For example, at the UK House of Commons Science and Technology Committee inquiry into the impact of social media and screen-use on young people's health use in adolescence, the Royal College of Paediatrics and Child Health (RCPCH) urged the UK government as a matter of priority to develop guidance for health practitioners along the same lines as the American Academy of Paediatrics (AAP) but importantly based on UK data<sup>1</sup>. They also argue along with other researchers that there is a need to refocus away from correlations between generic terms such as "screentime" and poor wellbeing, towards meaningfully quantifying how various types of technology use impact on different areas of child and adolescent health and wellbeing. This study presents UK data that provide a nationally representative profile of current adolescent social media use, and takes a data-driven approach to quantify sleep patterns for high and very high users relative to average users.

This study focuses on sleep, which – despite often being overlooked in public health messages and education interventions<sup>3 4</sup> – is increasingly recognised as a key component of wider health and wellbeing<sup>5</sup>. Adolescent sleep is an important public health issue, as insufficient sleep is highly prevalent in this age group and has implications for mental health, obesity, academic performance and safety<sup>6</sup>. With the majority of adolescents reporting insufficient sleep to function properly or to meet recommended guidelines<sup>7 8</sup>, there is growing concern that social media may be a contributing factor for today's teenagers. For example, the potential for 24/7 social media interactions may exacerbate the existing conflict of early school start times with naturally delayed adolescent rhythms and other social and educational demands<sup>6 9 10</sup>. As a highly relevant issue for paediatric practice, there is a clear need for UK evidence to inform and update decision making in medical practice and policy to address this current issue in adolescent sleep.

This study responds to this need, presenting large-scale UK data on adolescent sleep and social media use, whilst addressing a number of existing gaps in available international

1  
2  
3 evidence. In addition to providing much-needed UK evidence, the current approach also  
4 addresses the need for evidence that: (1) examines social media specifically, rather than  
5 generic screentime; (2) isolates effects for a range of sleep parameters by accounting for an  
6 extensive range of covariates; (3) frames these effects within the context of current  
7 adolescent social media norms to provide meaningful comparisons. The current approach to  
8 ensure that this evidence can meaningfully inform policy and practice by addressing each of  
9 these needs is discussed further below.  
10  
11  
12  
13  
14  
15  
16

17 Firstly, it is important for available evidence to examine social media individually, rather  
18 than aggregating these interactions and other media use under the umbrella term  
19 “screentime”. A recent large-scale US study indicated a significant but modest effect for  
20 overall screentime and sleep, and called for future research to examine effects for specific  
21 technologies <sup>11</sup>. In particular, the interactive nature of social media presents uniquely  
22 relevant issues for adolescent sleep compared to other forms of screentime or traditional  
23 media <sup>7 12</sup>. Although facilitated by screens, social media interactions are underpinned by the  
24 same drivers as any social interaction, with a desire for inclusion and belonging mixing with  
25 concerns over violating social expectations or etiquette <sup>13</sup>. These concerns can make it  
26 difficult to disengage from social media at bedtime, with some adolescents identifying this  
27 as a cause of delayed sleep onset and daytime tiredness <sup>13</sup>. These unique social and  
28 emotional aspects of online interactions underline the importance of examining social  
29 media use specifically, in relation to adolescent sleep outcomes.  
30  
31  
32  
33  
34  
35  
36  
37  
38  
39  
40  
41  
42

43 Secondly, to meaningfully inform an evidence-based response to social media use, research  
44 must examine multiple sleep parameters and isolate these effects by controlling for an  
45 extensive range of relevant covariates. This is crucial to assess the practical significance of  
46 underlying direct effects <sup>11</sup> and to identify which aspects of adolescent sleep merit attention  
47 to social media use in practice and policy. Available research on social media use and sleep  
48 is often left questioning whether reported effects could be explained by other individual  
49 factors: for example if more anxious, depressed or sedentary adolescents may tend to both  
50 use social media more and report poorer sleep <sup>12 14</sup>. Individual studies that have controlled  
51 for specific groups of covariates generally suggest that associations do persist <sup>15 16</sup>. However,  
52 there remains a need for large-scale evidence that addresses a wide range of covariates  
53  
54  
55  
56  
57  
58  
59  
60

1  
2  
3 simultaneously, to more robustly establish which dimensions of sleep have a direct  
4 association with social media use and which reflect another underlying issue (e.g. anxious or  
5 depressive symptoms).  
6  
7  
8  
9

10 This type of evidence is required to invest time and resources effectively, by identifying  
11 which sleep complaints may benefit from directly addressing social media use. For example,  
12 a range of sleep complaints from insufficient sleep to problems initiating or maintaining  
13 sleep have been examined in relation to social media use. In terms of sleep duration, time  
14 spent using social media may displace sleep directly or displace other daytime activities  
15 (such as homework) that are then delayed and disrupt nighttime routines<sup>9 17</sup>. Social media  
16 use may also impact on the quality of sleep via increased arousal, not simply through light  
17 exposure<sup>18</sup>, but particularly via cognitive and social activity<sup>12 14 19</sup>. Given these different  
18 potential mechanisms, it is therefore important to examine social media use in relation to a  
19 range of sleep parameters, to identify which of these links have the most practical  
20 significance after accounting for relevant factors.  
21  
22  
23  
24  
25  
26  
27  
28  
29  
30

31 Thirdly, evidence should frame these effects within the context of current norms for  
32 adolescent social media use. Research to date has tended to focus on problematic or  
33 "addicted" social media users<sup>10 20</sup>, or to compare outcomes for the highest users against the  
34 lowest users<sup>15 17 21</sup>. In contrast, first establishing what constitutes typical use and then  
35 comparing outcomes for relatively higher or lower users against this reference point can  
36 support more meaningful conclusions. This data-driven approach avoids imposing arbitrary  
37 or quickly outdated cut-offs, taking into account recent rapid increases in social media use  
38<sup>22</sup>. Comparing sleep patterns for higher users against average users can better support  
39 practical and realistic discussions on best practice, that consider the context of current  
40 adolescent social media norms.  
41  
42  
43  
44  
45  
46  
47  
48  
49  
50

51 This study targets these existing gaps in available international evidence, while providing  
52 much-needed large-scale UK evidence. It examines associations between social media use  
53 and multiple sleep parameters in a large, nationally representative adolescent sample: the  
54 UK Millennium Cohort Study<sup>23</sup>. It first investigates current norms in adolescent social media  
55 use to establish the average level of daily use and the prevalence of comparatively high use.  
56  
57  
58  
59  
60



1  
2  
3 It then examines which sleep parameters are associated with social media use, isolating  
4 these effects by controlling for extensive covariates and quantifying effects for higher users  
5 relative to average users. This aims to provide rigorous and meaningful evidence to inform  
6 practice and policy to support healthy adolescent sleep and social media use.  
7  
8  
9

## 10 11 12 **METHODS**

### 13 14 **Participants**

15  
16 The UK Millennium Cohort Study is a nationally representative, multidisciplinary survey  
17 which aims to explore the influence of family context on child and adolescent development  
18 and outcomes. The survey covers a broad range of domains, such as parenting, housing,  
19 poverty and health. It consists of a random 2-stage sample drawn from all live UK births in  
20 the 12-month period starting 1 September 2000 in England and Wales and 1 December  
21 2000 in Scotland and Northern Ireland, identified through the Child Benefit register <sup>23</sup>. The  
22 clustered sample is drawn from a disproportionately stratified sample of electoral wards  
23 (local areas) to provide adequate representation of areas with higher concentrations of  
24 minority ethnic and disadvantaged families. Parents completed the first survey sweep in  
25 2001 when their child was aged 9 months, with 18,818 cohort members. Children also  
26 completed surveys from age 7 (sweep 4) onwards. The most recent survey (sweep 6 at  
27 around age 14) gathered self-report data from 11,872 cohort members, including questions  
28 on their typical social media use and sleep patterns. Parents were required to give written  
29 consent to complete the parent survey and for the interviewer to invite the cohort member  
30 to participate in the young person survey. Cohort members then also had to give verbal  
31 consent to complete the young person survey, which was self-completed on the  
32 interviewer's tablet.  
33  
34  
35  
36  
37  
38  
39  
40  
41  
42  
43  
44  
45  
46  
47  
48

### 49 **Materials**

50 The current analyses make use of available data from the UK Millennium Cohort Study,  
51 which measured social media use and sleep using single-item self-report questions.  
52 Although not validated questionnaire measures, these survey questions do provide a  
53 snapshot of the subjective experience of sleep and social media use in this large  
54 representative sample, capturing a range of sleep habits and the typical time spent using  
55 social media each day.  
56  
57  
58  
59  
60

## Social media use

Participants indicated how much time they spent using social media on a typical weekday, choosing from 8 response categories (ranging from 0 hours to 7+ hours).

## Sleep parameters

Participants reported typical sleep habits through six single items (each with 5 or 6 response categories) that assessed: sleep onset and wake times (on school days and free days, separately), sleep onset latency (time taken to fall asleep) and trouble falling back asleep after nighttime awakening. The Supplementary Materials provide a full list of items and response categories.

## Covariates

In addition, the following relevant covariates (identified based on literature) had available data in the UK Millennium Cohort Study: demographics (ethnic minority status, OECD equivalised weekly family income); family composition (number of siblings in household, presence of both parents, age of primary parent/carer responder); psychosocial adjustment (using the parent-report Strengths and Difficulties Questionnaire)<sup>24</sup>; depressive symptoms (using the Short Mood and Feelings Questionnaire)<sup>25</sup>; self-esteem (using a shortened and adapted version of the Rosenberg Self-Esteem Scale)<sup>26</sup>; general health (single item), social support (three items) and physical activity (single item).

## Data analysis

Since the aim of the study was to compare sleep outcomes for high and low users versus average users, based on the distribution we initially collapsed responses into three categories: under 1 hour for 'low' users (33.7%), 1 to <3 hours for 'average' users (31.6%), and 3 hours or more for 'high' users (34.7%). Given the broad range covered by this 'high' user category (including responses of 3 to <5, 5 to <7 and 7+ hours), and with sufficient numbers, we separated this into 'high' (3 to <5 hours; 13.9%) and 'very high' users (5+ hours; 20.8%) to allow more detailed exploration.

We collapsed responses for each sleep measure into binary outcomes. For poor sleep quality, these outcomes were: sleep onset latency over 30 minutes<sup>27</sup> and difficulty falling

asleep following nighttime awakenings at least ‘a good bit of the time’. For late sleep onset and wake times, we took a data-driven approach to identify meaningful cut-off points, which were defined as later than average (including responses in categories later than the median response category). Table 1 summarises the resulting criteria for each sleep outcome and associated prevalence rates.

**Table 1** Social media use and sleep outcomes: criteria and prevalence

| Variable                                              | Criteria                          | Prevalence (%) |        |       |
|-------------------------------------------------------|-----------------------------------|----------------|--------|-------|
|                                                       |                                   | Male           | Female | Total |
| Daily social media use                                |                                   |                |        |       |
| Low                                                   | < 1 hour                          | 43.8           | 22.8   | 33.7  |
| Average                                               | 1 to <3 hours                     | 32.1           | 31.1   | 31.6  |
| High                                                  | 3 to <5 hours                     | 10.4           | 17.7   | 13.9  |
| Very high                                             | 5+ hours                          | 13.7           | 28.4   | 20.8  |
| Sleep outcomes                                        |                                   |                |        |       |
| Late sleep onset (school day)                         | After 11pm                        | 25.5           | 26.5   | 26.0  |
| Late sleep onset (free day)                           | After midnight                    | 35.2           | 32.1   | 33.7  |
| Late wake time (school day)                           | After 8am                         | 5.3            | 2.7    | 4.0   |
| Late wake time (free day)                             | After 11am                        | 22.5           | 21.5   | 22.0  |
| Long sleep onset latency                              | Over 30 minutes                   | 31.5           | 37.0   | 34.1  |
| Trouble falling back asleep after nighttime awakening | At least ‘a good bit of the time’ | 16.9           | 25.7   | 21.1  |

Notes: Percentages account for survey design and weights. Criteria for late sleep onset and wake times defined as later than the median response category. Gender difference in daily social media use, late wake time (school day), long sleep onset latency and trouble falling back asleep after nighttime awakening  $p < .001$ ; gender difference in late sleep onset (free day)  $p < .01$ . For a breakdown of social media use by other demographics (household income and ethnicity), see the Supplementary Materials.

Separate binomial logistic regression models predicted Odds Ratios of each sleep outcome for low, high and very high social media users, compared to average users. We ran models that controlled only for exact age and sex, followed by models that further controlled for measures of demographics, family characteristics, psychological wellbeing and health (see Materials section for full details). All analyses allowed for the complex survey design (with its clustered, stratified sample) and used longitudinal weights to account for non-random longitudinal attrition from the sample, using the ‘survey’ and ‘srvyr’ packages in R<sup>28-30</sup>.

1  
2  
3 Multiple imputation was performed to account for missing data, reducing bias and  
4 increasing power<sup>31</sup>. The overall missing data rate was 2.8%, ranging from 0.0% to 6.0% for  
5 individual measures, with most measures below 5%. We make the assumption that data are  
6 missing at random (i.e. that patterns of missingness can be explained by other variables  
7 available in the data;<sup>31</sup>). All variables, including covariates, were used in the imputation  
8 model, which was run using R package 'mice'<sup>32</sup>. Estimates were combined across 10  
9 imputed data sets (each produced through 10 iterations). Results were similar for analyses  
10 on multiply imputed and complete case data, so only multiply imputed analysis is presented  
11 here.  
12  
13  
14  
15  
16  
17  
18  
19  
20

## 21 RESULTS

22  
23 The median time spent using social media on a typical day was 1 to <3 hours (32% of  
24 adolescents); however, 21% used social media for at least 5 hours. Girls tended to use social  
25 media more than boys (see Table 1).  
26  
27  
28  
29

30 Median sleep onset times were 10-11pm on school days (with 26% falling asleep later than  
31 this) and between 11pm and midnight on free days (with 34% falling asleep later; see Table  
32 1). Median wake times were 7-8am on school days (with only 4% waking later than this) and  
33 10-11am on free days (with 22% waking later). Boys were more likely to fall asleep late on  
34 free days and wake up late on school days. In measures of poor sleep quality, 34% typically  
35 took longer than 30 minutes to fall asleep and 21% reported difficulties falling asleep  
36 following nighttime awakenings at least 'a good bit of the time'. Girls were more likely to  
37 have long sleep onset latency and trouble falling back asleep after nighttime awakening.  
38  
39  
40  
41  
42  
43  
44  
45

46 Separate binomial logistic regression models explored whether odds of each sleep outcome  
47 differed for low, high and very high social media users, compared to average users (1 to <3  
48 h). First, models controlled for exact age and sex (see Table 2). Very high social media use  
49 (5+ h) was associated with higher odds of all six sleep outcomes. High social media use (3 to  
50 <5 h) was associated with higher odds of all outcomes except for late rise times on free  
51 days. Low social media use (<1 h) was associated with lower odds of late sleep onset on  
52 school- and free- days, and late wake times on free days.  
53  
54  
55  
56  
57  
58  
59  
60

**Table 2** Binomial logistic regressions (adjusting only for age & sex)

|                                     | Low: <1 h<br>OR (95% CI) | Average: 1 to<br><3 h | High: 3 to <5 h<br>OR (95% CI) | Very high: 5+ h<br>OR (95% CI) |
|-------------------------------------|--------------------------|-----------------------|--------------------------------|--------------------------------|
| Late sleep onset<br>(school days)   | 0.63***<br>(0.53, 0.75)  | Reference<br>group    | 1.38***<br>(1.16, 1.65)        | 2.75***<br>(2.38, 3.18)        |
| Late sleep onset<br>(free days)     | 0.6***<br>(0.51, 0.7)    | “                     | 1.44***<br>(1.19, 1.74)        | 3.05***<br>(2.63, 3.54)        |
| Late wake time<br>(school days)     | 1.12<br>(0.77, 1.62)     | “                     | 1.63*<br>(1.05, 2.53)          | 2.49***<br>(1.62, 3.83)        |
| Late wake time<br>(free days)       | 0.81*<br>(0.69, 0.96)    | “                     | 1.16<br>(0.97, 1.39)           | 1.82***<br>(1.54, 2.16)        |
| Sleep Onset<br>Latency > 30 mins    | 0.92<br>(0.8, 1.05)      | “                     | 1.24*<br>(1.04, 1.49)          | 1.48***<br>(1.27, 1.71)        |
| Frequent<br>nighttime<br>awakenings | 1.06<br>(0.9, 1.26)      | “                     | 1.31*<br>(1.07, 1.61)          | 2.11***<br>(1.75, 2.55)        |

Notes: See Table 2 for criteria and prevalence of each sleep outcome. \* $p < .05$ , \*\* $p < .01$ , \*\*\* $p < .001$ . Odds Ratios measure how much higher or lower the odds of a given sleep outcome are for each category of social media user (Low, <1h; High, 3 to <5h; Very high, 5+h) compared to average users (1 to <3h). Odds Ratios and 95% Confidence Intervals greater than 1 indicate higher odds; those below 1 indicate lower odds. Odds Ratios are adjusted to control for exact age & sex.

Further modelling then controlled for a more comprehensive set of covariates (see Table 3, with note detailing list of covariates). High social media use was no longer significantly associated with long sleep onset latency or frequent nighttime awakenings. Very high social media was no longer significantly associated with long sleep onset latency; however, its association with frequent nighttime awakenings remained significant but smaller. Patterns of significant associations for late sleep onset and wake times remained unchanged, although effect sizes were reduced, particularly for very high social media use.

**Table 3** Binomial logistic regressions (with further adjustments for covariates)

|  | Low: <1 h<br>OR (95% CI) | Average: 1 to<br><3 h | High: 3 to <5 h<br>OR (95% CI) | Very high: 5+ h<br>OR (95% CI) |
|--|--------------------------|-----------------------|--------------------------------|--------------------------------|
|--|--------------------------|-----------------------|--------------------------------|--------------------------------|

|                                |                         |                 |                       |                         |
|--------------------------------|-------------------------|-----------------|-----------------------|-------------------------|
| Late sleep onset (school days) | 0.61***<br>(0.51, 0.73) | Reference group | 1.23*<br>(1.02, 1.49) | 2.14***<br>(1.83, 2.5)  |
| Late sleep onset (free days)   | 0.57***<br>(0.49, 0.68) | “               | 1.32**<br>(1.09, 1.6) | 2.41***<br>(2.08, 2.79) |
| Late wake time (school days)   | 1.04<br>(0.71, 1.5)     | “               | 1.56*<br>(1.02, 2.4)  | 1.97**<br>(1.32, 2.93)  |
| Late wake time (free days)     | 0.79**<br>(0.67, 0.93)  | “               | 1.12<br>(0.92, 1.35)  | 1.57***<br>(1.32, 1.87) |
| Sleep Onset Latency > 30 mins  | 0.9<br>(0.78, 1.04)     | “               | 1.11<br>(0.92, 1.34)  | 1.12<br>(0.96, 1.32)    |
| Frequent nighttime awakenings  | 1.04<br>(0.88, 1.24)    | “               | 1.08<br>(0.87, 1.35)  | 1.36**<br>(1.1, 1.66)   |

Notes: See Table 2 for criteria and prevalence of each sleep outcome. \* $p < .05$ , \*\* $p < .01$ , \*\*\* $p < .001$ . Odds Ratios are adjusted to control for: exact age, sex, ethnic minority status, family income, number of siblings in household, presence of both parents in household, parent age, Strengths and Difficulties score, Mood and Feelings score, self-esteem, general health, social support and physical activity.

For ease of interpretation, we also transformed the resulting adjusted Odds Ratios from these covariate models into adjusted Relative Risks<sup>33</sup> (see Table 4). These summarise differences in *probabilities*, as opposed to odds, and can be interpreted more intuitively. For example, the adjusted relative risk of 1.68 indicates that an adolescent with very high social media use is 68% more likely to fall asleep after 11pm on school nights than a comparable adolescent (controlling for covariates) with average social media use.

**Table 4** Relative Risks (from covariate-adjusted models)

|                                | Low: <1 h<br>RR (95% CI) | Average: 1 to<br><3 h | High: 3 to <5 h<br>RR (95% CI) | Very high: 5+ h<br>RR (95% CI) |
|--------------------------------|--------------------------|-----------------------|--------------------------------|--------------------------------|
| Late sleep onset (school days) | 0.67***<br>(0.58, 0.78)  | Reference group       | 1.17*<br>(1.02, 1.33)          | 1.68***<br>(1.52, 1.84)        |
| Late sleep onset (free days)   | 0.66***<br>(0.58, 0.75)  | “                     | 1.2**<br>(1.06, 1.35)          | 1.69***<br>(1.57, 1.81)        |

|                                     |                        |   |                       |                         |
|-------------------------------------|------------------------|---|-----------------------|-------------------------|
| Late wake time<br>(school days)     | 1.03<br>(0.72, 1.48)   | “ | 1.54*<br>(1.02, 2.29) | 1.91**<br>(1.3, 2.76)   |
| Late wake time<br>(free days)       | 0.83**<br>(0.72, 0.95) | “ | 1.09<br>(0.94, 1.26)  | 1.41***<br>(1.24, 1.59) |
| Sleep Onset<br>Latency > 30 mins    | 0.93<br>(0.84, 1.03)   | “ | 1.07<br>(0.94, 1.21)  | 1.08<br>(0.97, 1.2)     |
| Frequent<br>nighttime<br>awakenings | 1.03<br>(0.89, 1.19)   | “ | 1.07<br>(0.89, 1.28)  | 1.28**<br>(1.09, 1.5)   |

Notes: Relative Risks transformed from Odds Ratios in covariate-controlled binomial logistic regression models (see Table 3). E.g. RR of 1.68 means very high users are 68% more likely to fall asleep late on school days than comparable average users. \* $p < .05$ , \*\* $p < .01$ , \*\*\* $p < .001$ .

## DISCUSSION

This study aimed to address calls from those working in policy and practice to establish a UK data driven profile of current adolescent daily social media use, and to examine links to a key component of wider adolescent health and wellbeing using multiple sleep parameters whilst accounting for a wide range of covariates, using data from a large nationally representative sample of UK adolescents. The results highlighted a wide range of reported daily social media use, with tertiles defining low, average and high use on a typical school day as <1 hour, 1 to <3 hours and 3+ hours respectively. This indicates generally heavier social media use compared to young adults<sup>21</sup> and provides a current normative profile for UK adolescents. One in five adolescents were classed as very high users, spending 5+ hours using social media on a typical school day, whereas two thirds of the sample used social media for less than 3 hours. This provides a data-driven profile of use to support decision-making, rather than relying on assumptions around prevalence of high use. In line with previous studies, girls tended to spend more time on social media than boys<sup>34 35</sup> and report poorer sleep quality<sup>36 37</sup>. This reinforces the importance of controlling for gender when examining these associations, and highlights the need for continued work to explore the sleep implications of *how* adolescent boys and girls spend their time on social media (with previous evidence of gender differences in preferred platforms, motivations and self-presentation<sup>34 35 38</sup>).

1  
2  
3 In terms of sleep timing, social media use remained significantly associated with late sleep  
4 onset and wake times after controlling for covariates, with the strongest effect for sleep  
5 onset. Very high social media users were roughly 70% more likely than comparable average  
6 users to fall asleep later than average, i.e. after 11pm on school days and after midnight on  
7 free days. Low social media users were least likely to fall asleep late, indicating that unlike  
8 mental wellbeing, optimal outcomes for sleep are associated with minimal – not moderate –  
9 use<sup>39</sup>. These findings are consistent with the idea that social media displaces sleep: either  
10 directly or indirectly<sup>9 17</sup>. Direct sleep displacement may be particularly likely on school days,  
11 especially for very high users, since limited social media access during school hours means  
12 that at least part of this daily time on social media is likely to take place close to bedtime.  
13 Bedtime social media use can delay sleep onset<sup>14</sup>, with some adolescents reporting  
14 difficulties disengaging from social media to sleep<sup>13</sup>. A similar process could also indirectly  
15 delay sleep onset, if other daytime activities (e.g. homework) are delayed due to a sense of  
16 urgency to check and respond to social media notifications. This link to later sleep onset is a  
17 particular concern on school days, as late school day bedtimes longitudinally predict poorer  
18 academic and emotional outcomes<sup>40</sup>. Whilst the survey question aimed to measure sleep  
19 onset time by asking what time participants “go to sleep”, some participants may have  
20 reported the time that they get into bed, in which case actual sleep onset would be even  
21 further delayed<sup>41</sup>.

22  
23  
24  
25  
26  
27  
28  
29  
30  
31  
32  
33  
34  
35  
36  
37  
38  
39  
40 Social media use was also associated with later wake times on school days (for both high  
41 and very high users) and on free days (for very high users). This overall pattern of later sleep  
42 timing amongst heavier social media users could be driven partly by circadian factors, if  
43 adolescents with a natural preference for later sleep timing use social media to fill time in  
44 the late evening until they feel sleepy. This possibility merits further investigation.  
45 Alternatively, this later sleep timing could suggest that heavier social media users may  
46 compensate for later sleep onset with later wake times that still allow sufficient sleep. This  
47 compensation may be possible on free days, with flexible rise times. However, on school  
48 days only 4% of adolescents reported late wake times (after 8am), as fixed rise times mean  
49 that later sleep onset effectively equates to shorter sleep opportunity on school days<sup>6 40</sup>.  
50 Consequently, these slightly later rise times are unlikely to fully compensate for delayed  
51 sleep onset on school days and suggest sleep restriction in a population where sleep need is  
52  
53  
54  
55  
56  
57  
58  
59  
60



1  
2  
3 high <sup>6</sup>. Across the sample, this observed pattern of later sleep onset and rise times on free  
4 days compared to school days is consistent with well-established delays to the circadian  
5 rhythm during this developmental period<sup>42 43</sup>, with growing pressure on policymakers to  
6 delay school start times to better align with adolescent body clocks<sup>44</sup>.  
7  
8  
9

10  
11  
12 Delayed sleep onset is therefore a key issue to target in relation to adolescents' social media  
13 use. The current cross-sectional study cannot establish causality; however, some  
14 adolescents do report delaying bedtimes as a result of social media use <sup>13 45</sup>. Adolescent  
15 sleep interventions should therefore consider assessing the impact of social media use on  
16 sleep schedules as standard. Further research can explore adolescents' motivations for  
17 prioritising social media over other needs, including sleep<sup>13</sup>, and identify factors that lead  
18 some individuals to struggle with this more than others. This can inform efforts to  
19 effectively support young people to balance online interactions (and the benefits they can  
20 offer; <sup>39 46 47</sup>) with an appropriate and consistent sleep schedule across the week,  
21 particularly to allow sufficient sleep on school nights. By helping to combat insufficient  
22 sleep, this can have a positive impact on adolescent physical and mental health, daytime  
23 functioning and academic performance, addressing a significant health and educational  
24 burden <sup>6</sup>.  
25  
26  
27  
28  
29  
30  
31  
32  
33  
34  
35  
36

37  
38 In terms of sleep quality, very high social media users were more likely to experience  
39 nighttime awakenings than comparable average users, whereas the effect for long sleep  
40 onset latency was fully explained by covariates. Previous studies have found a significant  
41 association between social media use and measures of sleep disturbance (including long  
42 sleep onset latency and difficulty falling asleep) when controlling for: age and sex <sup>19</sup>;  
43 sociodemographic measures <sup>21</sup>; and sleep hygiene behaviours <sup>15</sup>. The current more  
44 extensive set of covariates also included measures of psychological wellbeing (depression  
45 and psychosocial adjustment), which were strong predictors of long sleep onset latency and  
46 have been shown to be linked to generic screentime in previous work <sup>39</sup>. Therefore,  
47 considering previous and current findings together, this suggests that although adolescents  
48 who spend more time on social media do tend to take longer to fall asleep, both these  
49 behaviours could reflect underlying aspects of wellbeing, with depression and anxiety linked  
50 to both poor sleep quality and social media use <sup>16</sup>. This is consistent with evidence that  
51  
52  
53  
54  
55  
56  
57  
58  
59  
60

1  
2  
3 sleep onset latency and pre-sleep cognitive arousal is predicted by underlying concerns  
4 about potentially missing out, rather than social media behaviour itself <sup>14</sup>. Since the purpose  
5 of this study was to isolate and quantify associations between social media use and sleep,  
6 the current approach of including wellbeing measures as covariates provided this insight  
7 into which sleep associations do and do not persist independent of wellbeing and other  
8 covariates. However, future studies can specifically examine in more detail which aspects of  
9 mental health and wellbeing may mediate or moderate these associations. Given the  
10 increasing recognition of sleep and mental health as two inextricably linked aspects of  
11 health <sup>48</sup>, the current findings lay the foundation for more complex model testing to  
12 examine the likely bidirectional and interactive effects between social media use, sleep,  
13 mental health and other associated measures, such as school performance. Applying this  
14 approach to longitudinal and experimental data will be particularly valuable to elucidate  
15 these complex mechanisms, and to build a more holistic and balanced understanding of  
16 social media's links to both positive and negative aspects of health and wellbeing.  
17  
18  
19  
20  
21  
22  
23  
24  
25  
26  
27  
28  
29

30  
31 In contrast, the association between social media use and nighttime awakenings was only  
32 partly explained by covariates, with very high social media users still 28% more likely to have  
33 frequent difficulties with nighttime awakenings than comparable average users. Social  
34 media notification alerts may disrupt sleep during the night, particularly if users then  
35 respond by re-engaging with social media. Adolescents who use social media more also tend  
36 to have a stronger emotional connection to platforms and experience more fear of missing  
37 out <sup>14 49</sup>. Therefore, it is possible that very high users are more likely to remain vigilant for  
38 incoming social media alerts or to respond to these during the night, increasing arousal and  
39 contributing to difficulties falling asleep again. Further research can focus on this type of  
40 specific social media behaviours during the night, to examine whether they explain the link  
41 between higher overall use and nighttime awakenings. If incoming alerts are indeed mostly  
42 responsible, interventions can promote simple practical steps such as setting 'do not  
43 disturb' periods on social media apps.  
44  
45  
46  
47  
48  
49  
50  
51  
52  
53  
54

### 55 **Limitations**

56  
57 These findings should be considered within the limitations of the current study. Given the  
58 broad scope of the UK Millennium Cohort Study, sleep and social media use were measured  
59  
60

1  
2  
3 using individual questions rather than validated multi-item questionnaires. This limits the  
4 current analyses to a single measure of social media use - defined as the amount of time  
5 spent using social media on a typical day - which does not capture the different experiences  
6 of individual users,<sup>50</sup> for example in terms of content, context, timing and emotional  
7 engagement. Future research should carefully consider a range of measures to provide a  
8 more holistic view of adolescents' experiences of using social media, particularly since  
9 evidence highlights the importance of emotional and cognitive aspects of social media use  
10 for sleep <sup>14 16</sup>. To support future research, there is a clear need to establish *validated*  
11 measurement tools that move beyond hours per day to capture these more nuanced  
12 aspects of social media engagement. This is a key area for future development, as available  
13 tools limit the scope of potential research questions, conclusions and recommendations.  
14 Improved measurement tools moving forward can enhance understanding of the  
15 mechanisms linking social media use and sleep, as well as providing a more balanced view of  
16 both positive and negative impacts of social media experiences.  
17  
18  
19  
20  
21  
22  
23  
24  
25  
26  
27  
28  
29

30 These analyses make use of six available reported sleep parameters from this  
31 representative cohort, which do allow a rounded picture of timing and quality, but future  
32 research would benefit from including validated measures of sleep duration and quality, as  
33 well as circadian preference. The current self-reported sleep measures offer valuable insight  
34 into adolescents' *subjective experience* of sleep, which is one important component of  
35 sleep, but this can diverge from verifiable objective measures of sleep parameters provided  
36 by other methods, such as the gold-standard polysomnography <sup>51 52</sup>. In particular, sleep  
37 state misperception in both good and poor sleepers can result in poor self-report estimates  
38 of sleep onset latency <sup>52 53</sup>. The current analyses therefore contribute one part of the  
39 picture, with a continued need to triangulate insight from multiple methodologies (both  
40 subjective and objective) to build a more nuanced, holistic understanding of adolescent  
41 social media use and sleep <sup>51 54</sup>.  
42  
43  
44  
45  
46  
47  
48  
49  
50  
51  
52  
53

54 Furthermore, this study presents cross-sectional data, which precludes conclusions of  
55 causality. Cross-sectional analyses are prevalent in this research area, with calls for  
56 longitudinal and experimental work to enrich current understanding<sup>55 56</sup>. Recent studies on  
57 general technology use have supported bidirectional links between higher technology use  
58  
59  
60

1  
2  
3 and shorter sleep in adolescents<sup>57</sup>, with evidence that restricting phone access can advance  
4 bedtimes and extend sleep opportunity<sup>58</sup>. Restricting adolescent social media use is likely to  
5 be especially challenging, as this is a developmental period of increasing autonomy during  
6 which peer interactions, belonging and acceptance are highly valued<sup>2</sup>. Therefore, an  
7 important avenue for future research is establishing how best to support young people to  
8 balance these rewarding online social interactions with an appropriate and consistent sleep  
9 schedule, to optimise associated health- and school- outcomes.  
10  
11

12  
13  
14  
15  
16  
17 Finally, we note that research in this area is constantly contending with rapidly evolving  
18 social media platforms and associated norms and expectations for online interactions. This  
19 can be particularly challenging for this type of large national cohort data, which in this case  
20 provides a snapshot of UK adolescents' social media use in 2015.  
21  
22  
23  
24  
25

## 26 **Conclusions**

27  
28 This study provides robust evidence on associations between social media use and sleep  
29 outcomes, controlling for an extensive range of covariates, in a large nationally  
30 representative sample of UK adolescents. It provides a normative profile of adolescent  
31 social media use and sleep in the UK, which can be used as a baseline to support evidence-  
32 based decision-making policy and practice rather than relying on assumptions around  
33 prevalence of high social media use. The findings indicate statistically and practically  
34 significant associations between social media use and sleep patterns, particularly late sleep  
35 onset. Future research should explore the context and experience of time using social  
36 media, to inform more meaningful discussions around best practice and updating sleep  
37 education and interventions to meet the needs of today's society. Interventions should  
38 focus on addressing delayed sleep onset, by supporting young people to balance online  
39 social interactions with an appropriate and consistent sleep schedule that allows sufficient  
40 sleep on school nights, with benefits for health and educational outcomes.  
41  
42  
43  
44  
45  
46  
47  
48  
49  
50  
51  
52  
53  
54  
55  
56  
57  
58  
59  
60

## STATEMENTS RELATING TO THIS MANUSCRIPT

### Acknowledgements

The authors would like to thank A Przybylski and J Lewsey for helpful discussions when planning methodology.

### Statement of competing interests

Competing interests: All authors have completed the ICMJE uniform disclosure form at [www.icmje.org/coi\\_disclosure.pdf](http://www.icmje.org/coi_disclosure.pdf) and declare: no support from any organisation for the submitted work; no financial relationships with any organisations that might have an interest in the submitted work in the previous three years; no other relationships or activities that could appear to have influenced the submitted work.

### Funding statement

This study was funded by an Economic and Social Research Council +3 PhD studentship for HS. The Millennium Cohort Study was funded by the Economic and Social Research Council.

### Contributorship statement

HS designed the study and carried out data analysis. HS, HCW and SB interpreted the findings. HS drafted the manuscript in consultation with HCW. HCW and SB revised the manuscript for important intellectual content. All authors approve the submitted manuscript and agree to be accountable for all aspects of the work.

### Ethics approval

The Millennium Cohort Study Sweep 6 was approved by the London Multicentre Research Ethics Committee (13/LO/1786).

### Data availability statement

Data from the sixth sweep of the Millennium Cohort Study are available on the UK Data Service (DOI: 10.5255/UKDA-SN-8156-4).

### Patient and Public Involvement

The public were not involved in designing this secondary data analysis or writing this manuscript.

### **Transparency statement**

The lead author and guarantor, Holly Scott, affirms that this manuscript is an honest, accurate, and transparent account of the study being reported; that no important aspects of the study have been omitted; and that any discrepancies from the study as planned have been explained.

### **Dissemination declaration**

This work presents secondary analysis of data deposited in the UK Data Service. It is therefore not possible for the authors to share the current findings directly with original study participants.

### **Exclusive licence**

The Corresponding Author, Holly Scott, has the right to grant on behalf of all authors and does grant on behalf of all authors, a worldwide licence to the Publishers and its licensees in perpetuity, in all forms, formats and media (whether known now or created in the future), to i) publish, reproduce, distribute, display and store the Contribution, ii) translate the Contribution into other languages, create adaptations, reprints, include within collections and create summaries, extracts and/or, abstracts of the Contribution, iii) create any other derivative work(s) based on the Contribution, iv) to exploit all subsidiary rights in the Contribution, v) the inclusion of electronic links from the Contribution to third party material where-ever it may be located; and, vi) licence any third party to do any or all of the above.

## REFERENCES

1. UK House of Commons. Written evidence submitted by the Royal College of Paediatrics and Child Health (SMH0156). In: Science and Technology Committee, ed. UK, 2018.
2. Blakemore S-J. Avoiding Social Risk in Adolescence. *Current Directions in Psychological Science* 2018;27(2):116-22. doi: 10.1177/0963721417738144
3. Gruber R, Wiebe ST, Wells SA, et al. Sleep and academic success: mechanisms, empirical evidence, and interventional strategies. *Adolescent medicine: state of the art reviews* 2010;21(3):522-41, x. [published Online First: 2011/02/10]
4. Perry GS, Patil SP, Presley-Cantrell LR. Raising awareness of sleep as a healthy behavior. *Prev Chronic Dis* 2013;10:E133-E33. doi: 10.5888/pcd10.130081
5. Walker M. Why we sleep: The new science of sleep and dreams. London: Penguin UK 2018.
6. Owens J. Insufficient Sleep in Adolescents and Young Adults: An Update on Causes and Consequences. *Pediatrics* 2014;134(3):E921-E32. doi: 10.1542/peds.2014-1696
7. Gradisar M, Wolfson AR, Harvey AG, et al. The sleep and technology use of Americans: findings from the National Sleep Foundation's 2011 Sleep in America poll. *Journal of clinical sleep medicine : JCSM : official publication of the American Academy of Sleep Medicine* 2013;9(12):1291-9. doi: 10.5664/jcsm.3272 [published Online First: 2013/12/18]
8. Eaton DK, McKnight-Eily LR, Lowry R, et al. Prevalence of Insufficient, Borderline, and Optimal Hours of Sleep Among High School Students – United States, 2007. *J Adolescent Health* 2010;46(4):399-401. doi: <https://doi.org/10.1016/j.jadohealth.2009.10.011>
9. Cain N, Gradisar M. Electronic media use and sleep in school-aged children and adolescents: A review. *Sleep Med* 2010;11(8):735-42. doi: 10.1016/j.sleep.2010.02.006
10. Vernon L, Barber BL, Modecki KL. Adolescent Problematic Social Networking and School Experiences: The Mediating Effects of Sleep Disruptions and Sleep Quality. *CyberPsychology, Behavior & Social Networking* 2015;18(7):386-92. doi: 10.1089/cyber.2015.0107
11. Przybylski AK. Digital Screen Time and Pediatric Sleep: Evidence from a Preregistered Cohort Study. *The Journal of Pediatrics* 2018 doi: 10.1016/j.jpeds.2018.09.054
12. Hale L, Guan S. Screen time and sleep among school-aged children and adolescents: a systematic literature review. *Sleep Med Rev* 2015;21:50-8. doi: 10.1016/j.smrv.2014.07.007 [published Online First: 2014/09/07]
13. Scott H, Biello S, Woods HC. Identifying drivers for bedtime social media use despite sleep costs: the adolescent perspective. . 12 Oct 2018 12 October 2018. <https://doi.org/10.31234/osf.io/2xb36>.
14. Scott H, Woods HC. Fear of missing out and sleep: Cognitive behavioural factors in adolescents' nighttime social media use. *Journal of Adolescence* 2018;68:61-65. doi: <https://doi.org/10.1016/j.adolescence.2018.07.009>
15. Arora T, Broglia E, Thomas GN, et al. Associations between specific technologies and adolescent sleep quantity, sleep quality, and parasomnias. *Sleep Med* 2014;15(2):240-47. doi: <https://doi.org/10.1016/j.sleep.2013.08.799>

16. Woods HC, Scott H. #Sleepyteens: Social media use in adolescence is associated with poor sleep quality, anxiety, depression and low self-esteem. *J Adolesc* 2016;51:41-9. doi: 10.1016/j.adolescence.2016.05.008
17. Levenson JC, Shensa A, Sidani JE, et al. Social media use before bed and sleep disturbance among young adults in the United States: a nationally representative study. *Sleep* 2017;40(9):zsx113-zsx13. doi: 10.1093/sleep/zsx113
18. Chang A-M, Aeschbach D, Duffy JF, et al. Evening use of light-emitting eReaders negatively affects sleep, circadian timing, and next-morning alertness. *Proceedings of the National Academy of Sciences* 2015;112(4):1232-37. doi: 10.1073/pnas.1418490112
19. Harbard E, Allen NB, Trinder J, et al. What's Keeping Teenagers Up? Prebedtime Behaviors and Actigraphy-Assessed Sleep Over School and Vacation. *J Adolescent Health* 2016;58(4):426-32. doi: 10.1016/j.jadohealth.2015.12.011
20. An J, Sun Y, Wan Y, et al. Associations between problematic internet use and adolescents' physical and psychological symptoms: possible role of sleep quality. *Journal of addiction medicine* 2014;8(4):282-7. doi: 10.1097/adm.000000000000026 [published Online First: 2014/07/16]
21. Levenson JC, Shensa A, Sidani JE, et al. The association between social media use and sleep disturbance among young adults. *Prev Med* 2016;85:36-41. doi: 10.1016/j.ypmed.2016.01.001
22. Pew Research Center. Social Media Use in 2018, March 2018.
23. Centre for Longitudinal Studies. Millennium Cohort Study Sixth Sweep (MCS6): Technical Report: UCL Institute of Education, 2017.
24. Goodman R. Psychometric Properties of the Strengths and Difficulties Questionnaire. *Journal of the American Academy of Child & Adolescent Psychiatry* 2001;40(11):1337-45. doi: 10.1097/00004583-200111000-00015
25. Angold A, Costello EJ, Messer SC, et al. Development of a short questionnaire for use in epidemiological studies of depression in children and adolescents. *International Journal of Methods in Psychiatric Research* 1995;5(4):237-49.
26. Rosenberg M. Society and the adolescent self-image. 1965
27. Lichstein KL, Durrence HH, Taylor DJ, et al. Quantitative criteria for insomnia. *Behav Res Ther* 2003;41(4):427-45. doi: 10.1016/s0005-7967(02)00023-2
28. srvyr: 'dplyr'-like syntax for summary statistics of survey data. [program]. 0.3.0 version, 2018.
29. Lumley T. Analysis of Complex Survey Samples. *2004* 2004;9(8):19. doi: 10.18637/jss.v009.i08 [published Online First: 2004-01-08]
30. survey: analysis of complex survey samples [program]. 3.32 version, 2017.
31. Sterne JAC, White IR, Carlin JB, et al. Multiple imputation for missing data in epidemiological and clinical research: potential and pitfalls. *BMJ* 2009;338 doi: 10.1136/bmj.b2393
32. van Buuren S, Groothuis-Oudshoorn K. mice: Multivariate Imputation by Chained Equations in R. *J Stat Softw* 2011;45(3):1-67.
33. Zhang J, Yu KF. What's the relative risk? A method of correcting the odds ratio in cohort studies of common outcomes. *Jama* 1998;280(19):1690-1. [published Online First: 1998/12/01]
34. Pew Research Center. Teens' social media habits and experiences, November 2018.



- 1
- 2
- 3
- 4 35. Herring SC, Kapidzic S. Teens, Gender, and Self-Presentation in Social Media. In: Wright
- 5 JD, ed. *International Encyclopedia of the Social & Behavioral Sciences* (Second
- 6 Edition). Oxford: Elsevier 2015:146-52.
- 7 36. Galland BC, Short MA, Terrill P, et al. Establishing normal values for pediatric nighttime
- 8 sleep measured by actigraphy: a systematic review and meta-analysis. *Sleep*
- 9 2018;41(4) doi: 10.1093/sleep/zsy017 [published Online First: 2018/03/29]
- 10 37. Hysing M, Pallesen S, Stormark KM, et al. Sleep patterns and insomnia among
- 11 adolescents: a population-based study. *J Sleep Res* 2013;22(5):549-56. doi:
- 12 10.1111/jsr.12055 [published Online First: 2013/04/25]
- 13 38. Kuss DJ, Griffiths MD. Online Social Networking and Addiction—A Review of the
- 14 Psychological Literature. *International Journal of Environmental Research and Public*
- 15 *Health* 2011;8(9) doi: 10.3390/ijerph8093528
- 16 39. Przybylski AK, Weinstein N. A Large-Scale Test of the Goldilocks Hypothesis: Quantifying
- 17 the Relations Between Digital-Screen Use and the Mental Well-Being of Adolescents.
- 18 *Psychological Science* 2017;28(2):204-15. doi: 10.1177/0956797616678438
- 19 40. Asarnow LD, McGlinchey E, Harvey AG. The effects of bedtime and sleep duration on
- 20 academic and emotional outcomes in a nationally representative sample of
- 21 adolescents. *The Journal of adolescent health : official publication of the Society for*
- 22 *Adolescent Medicine* 2014;54(3):350-6. doi: 10.1016/j.jadohealth.2013.09.004
- 23 [published Online First: 2013/11/15]
- 24 41. Exelmans L, Van den Bulck J. Bedtime, shuteye time and electronic media: sleep
- 25 displacement is a two-step process. *J Sleep Res* 2017;26(3):364-70. doi:
- 26 10.1111/jsr.12510
- 27 42. Carskadon MA. Sleep in adolescents: the perfect storm. *Pediatric clinics of North*
- 28 *America* 2011;58(3):637-47. doi: 10.1016/j.pcl.2011.03.003
- 29 43. Roenneberg T, Kuehnele T, Pramstaller PP, et al. A marker for the end of adolescence.
- 30 *Current Biology* 2004;14(24):R1038-R39. doi:
- 31 <http://dx.doi.org/10.1016/j.cub.2004.11.039>
- 32 44. Owens J, Drobnich D, Baylor A, et al. School Start Time Change: An In-Depth Examination
- 33 of School Districts in the United States. *Mind, Brain, and Education* 2014;8(4):182-
- 34 213. doi: 10.1111/mbe.12059
- 35 45. Espinoza G, Juvonen J. The Pervasiveness, Connectedness, and Intrusiveness of Social
- 36 Network Site Use Among Young Adolescents. *Cyberpsych Beh Soc N*
- 37 2011;14(12):705-09. doi: 10.1089/cyber.2010.0492
- 38 46. Davis K. Friendship 2.0: adolescents' experiences of belonging and self-disclosure online.
- 39 *J Adolesc* 2012;35(6):1527-36. doi: 10.1016/j.adolescence.2012.02.013
- 40 47. Davis K. Young people's digital lives: The impact of interpersonal relationships and digital
- 41 media use on adolescents' sense of identity. *Computers in Human Behavior*
- 42 2013;29(6):2281-93. doi: <https://doi.org/10.1016/j.chb.2013.05.022>
- 43 48. Reynolds CF, 3rd, O'Hara R. DSM-5 sleep-wake disorders classification: overview for use
- 44 in clinical practice. *The American journal of psychiatry* 2013;170(10):1099-101. doi:
- 45 10.1176/appi.ajp.2013.13010058 [published Online First: 2013/10/03]
- 46 49. Przybylski AK, Murayama K, DeHaan CR, et al. Motivational, emotional, and behavioral
- 47 correlates of fear of missing out. *Computers in Human Behavior* 2013;29(4):1841-48.
- 48 doi: 10.1016/j.chb.2013.02.014
- 49
- 50
- 51
- 52
- 53
- 54
- 55
- 56
- 57
- 58
- 59
- 60

- 1  
2  
3  
4  
5  
6  
7  
8  
9  
10  
11  
12  
13  
14  
15  
16  
17  
18  
19  
20  
21  
22  
23  
24  
25  
26  
27  
28  
29  
30  
31  
32  
33  
34  
35  
36  
37  
38  
39  
40  
41  
42  
43  
44  
45  
46  
47  
48  
49  
50  
51  
52  
53  
54  
55  
56  
57  
58  
59  
60
50. Fox J, Moreland JJ. The dark side of social networking sites: An exploration of the relational and psychological stressors associated with Facebook use and affordances. *Computers in Human Behavior* 2015;45:168-76. doi: 10.1016/j.chb.2014.11.083
51. Tubbs AS, Dollish HK, Fernandez F, et al. Chapter 1 - The basics of sleep physiology and behavior. In: Grandner MA, ed. *Sleep and Health*: Academic Press 2019:3-10.
52. Fernandez-Mendoza J, Calhoun SL, Bixler EO, et al. Sleep misperception and chronic insomnia in the general population: role of objective sleep duration and psychological profiles. *Psychosomatic medicine* 2011;73(1):88-97. doi: 10.1097/PSY.0b013e3181fe365a [published Online First: 2010/10/28]
53. Silva GE, Goodwin JL, Sherrill DL, et al. Relationship between reported and measured sleep times: the sleep heart health study (SHHS). *Journal of clinical sleep medicine : JCSM : official publication of the American Academy of Sleep Medicine* 2007;3(6):622-30.
54. Gregory AM, Sadeh A. Sleep, emotional and behavioral difficulties in children and adolescents. *Sleep Med Rev* 2012;16(2):129-36. doi: <https://doi.org/10.1016/j.smrv.2011.03.007>
55. Bartel K, Gradisar M. New Directions in the Link Between Technology Use and Sleep in Young People. In: Nevšimalová S, Bruni O, eds. *Sleep Disorders in Children*. Cham: Springer International Publishing 2017:69-80.
56. Bhat S, Pinto-Zipp G, Upadhyay H, et al. "To sleep, perchance to tweet": in-bed electronic social media use and its associations with insomnia, daytime sleepiness, mood, and sleep duration in adults. *Sleep Health* 2018;4(2):166-73. doi: <https://doi.org/10.1016/j.sleh.2017.12.004>
57. Mazzer K, Bauducco S, Linton SJ, et al. Longitudinal associations between time spent using technology and sleep duration among adolescents. *J Adolesc* 2018;66:112-19. doi: 10.1016/j.adolescence.2018.05.004 [published Online First: 2018/05/31]
58. Bartel K, Scheeren R, Gradisar M. Altering Adolescents' Pre-Bedtime Phone Use to Achieve Better Sleep Health. *Health Communication* 2018:1-7. doi: 10.1080/10410236.2017.1422099

# Supplementary Materials

## Full breakdown of sleep patterns

**Supplementary Table 1.** Typical sleep onset (school days) for males & females

| Typical sleep onset on school days | Male |      | Female |      | Total |      |
|------------------------------------|------|------|--------|------|-------|------|
|                                    | %    | n    | %      | n    | %     | n    |
| Before 9 pm                        | 5.8  | 288  | 4.7    | 248  | 5.2   | 536  |
| 9 - 9:59 pm                        | 28.5 | 1619 | 30.0   | 1681 | 29.2  | 3300 |
| 10 - 10:59 pm                      | 40.2 | 2352 | 38.8   | 2284 | 39.5  | 4636 |
| 11 pm - midnight                   | 18.7 | 1076 | 20.3   | 1220 | 19.5  | 2296 |
| After midnight                     | 6.9  | 366  | 6.1    | 335  | 6.5   | 701  |

Notes: percentages account for survey design and weights.

**Supplementary Table 2.** Typical sleep onset (free days) for males & females

| Typical sleep onset on free days | Male |      | Female |      | Total |      |
|----------------------------------|------|------|--------|------|-------|------|
|                                  | %    | n    | %      | n    | %     | n    |
| Before 9 pm                      | 0.9  | 53   | 0.9    | 45   | 0.9   | 98   |
| 9 - 9:59 pm                      | 6.0  | 328  | 5.4    | 299  | 5.7   | 627  |
| 10 - 10:59 pm                    | 22.8 | 1311 | 24.4   | 1407 | 23.6  | 2718 |
| 11 pm - midnight                 | 35.1 | 2044 | 37.2   | 2208 | 36.1  | 4252 |
| After midnight                   | 35.2 | 1969 | 32.1   | 1808 | 33.7  | 3777 |

Notes: percentages account for survey design and weights. Gender difference in sleep onset (free days)  $p < .05$ .

**Supplementary Table 3.** Typical wake time (school days) for males & females

| Typical wake time on school days | Male |      | Female |      | Total |      |
|----------------------------------|------|------|--------|------|-------|------|
|                                  | %    | n    | %      | n    | %     | n    |
| Before 6 am                      | 4.4  | 220  | 4.5    | 230  | 4.5   | 450  |
| 6 - 6:59 am                      | 37.0 | 1995 | 47.9   | 2609 | 42.2  | 4604 |
| 7 - 7:59 am                      | 53.3 | 3205 | 44.9   | 2771 | 49.3  | 5976 |
| 8 - 8:59 am                      | 4.0  | 247  | 2.1    | 130  | 3.1   | 377  |
| After 9 am                       | 1.3  | 42   | 0.6    | 32   | 1.0   | 74   |

Notes: percentages account for survey design and weights. Gender difference in wake time (school days)  $p < .001$ .

**Supplementary Table 4.** Typical wake time (free days) for males & females

| Typical wake time on free days | Male |      | Female |      | Total |      |
|--------------------------------|------|------|--------|------|-------|------|
|                                | %    | n    | %      | n    | %     | n    |
| Before 8 am                    | 9.9  | 545  | 6.4    | 342  | 8.2   | 887  |
| 8 - 8:59 am                    | 17.1 | 940  | 15.6   | 846  | 16.3  | 1786 |
| 9 - 9:59 am                    | 22.9 | 1348 | 26.5   | 1537 | 24.6  | 2885 |
| 10 - 10:59 am                  | 27.6 | 1628 | 30.2   | 1763 | 28.8  | 3391 |
| 11 - 11:59 am                  | 14.8 | 836  | 15.3   | 934  | 15.0  | 1770 |
| After midday                   | 7.8  | 401  | 6.2    | 348  | 7.0   | 749  |

Notes: percentages account for survey design and weights. Gender difference in wake time (free days)  $p < .001$ .

**Supplementary Table 5.** Typical sleep onset latency for males & females

| Typical sleep onset latency | Male |      | Female |      | Total |      |
|-----------------------------|------|------|--------|------|-------|------|
|                             | %    | n    | %      | n    | %     | n    |
| 0 - 15 minutes              | 37.1 | 2104 | 29.3   | 1709 | 33.3  | 3813 |
| 16 - 30 minutes             | 31.4 | 1838 | 33.7   | 1963 | 32.6  | 3801 |
| 31 - 45 minutes             | 14.8 | 819  | 17.3   | 973  | 16.0  | 1792 |
| 46 - 60 minutes             | 6.4  | 383  | 8.7    | 495  | 7.5   | 878  |
| More than 60 minutes        | 10.3 | 516  | 11.0   | 610  | 10.6  | 1126 |

Notes: percentages account for survey design and weights. Gender difference in sleep onset latency  $p < .001$ .

**Supplementary Table 6.** Frequency of nighttime awakenings for males & females

| Frequency of nighttime awakenings | Male |      | Female |      | Total |      |
|-----------------------------------|------|------|--------|------|-------|------|
|                                   | %    | n    | %      | n    | %     | n    |
| None of the time                  | 35.8 | 2050 | 24.1   | 1435 | 30.1  | 3485 |
| A little of the time              | 32.8 | 1951 | 32.7   | 1966 | 32.8  | 3917 |
| Some of the time                  | 14.5 | 831  | 17.6   | 991  | 16.0  | 1822 |
| A good bit of the time            | 7.0  | 380  | 10.7   | 583  | 8.8   | 963  |
| Most of the time                  | 6.7  | 337  | 10.7   | 554  | 8.6   | 891  |
| All of the time                   | 3.1  | 143  | 4.3    | 226  | 3.7   | 369  |

Notes: percentages account for survey design and weights. Gender difference in nighttime awakenings  $p < .001$ .

## Social media use by demographics

Table 1 in the main text provides a breakdown of social media use by gender. Supplementary tables 7 and 8 provide a breakdown of social media use by additional demographics: household income and ethnic minority status.

**Supplementary Table 7.** Social media use by household equivalised income

|                                             |                      | Social media use |                      |                   |                   | Total n |
|---------------------------------------------|----------------------|------------------|----------------------|-------------------|-------------------|---------|
|                                             |                      | Low<br><1 h      | Average<br>1 to <3 h | High<br>3 to <5 h | Very high<br>5+ h |         |
| <b>Household<br/>equivalized<br/>income</b> | Quintile 1 (lowest)  | 33.9             | 28.7                 | 11.3              | 26.1              | 2038    |
|                                             | Quintile 2           | 30.6             | 29.2                 | 16.3              | 23.9              | 2008    |
|                                             | Quintile 3           | 31.6             | 30.3                 | 15.2              | 22.9              | 2414    |
|                                             | Quintile 4           | 32.4             | 35.8                 | 14.0              | 17.9              | 2727    |
|                                             | Quintile 5 (highest) | 40.0             | 33.8                 | 12.7              | 13.6              | 2685    |

Notes: Numbers represent row percentages (e.g. 33.9% of cohort members in lowest income quintile were low social media users). Percentages account for survey design and weights. Income difference in social media use  $p < .001$ .

**Supplementary Table 8.** Social media use by ethnicity

|                  |           | Social media use |                      |                   |                   | Total n |
|------------------|-----------|------------------|----------------------|-------------------|-------------------|---------|
|                  |           | Low<br><1 h      | Average<br>1 to <3 h | High<br>3 to <5 h | Very high<br>5+ h |         |
| <b>Ethnicity</b> | White     | 32.9             | 31.7                 | 14.4              | 21.1              | 9086    |
|                  | Non-white | 37.3             | 31.4                 | 11.9              | 19.4              | 2326    |

Notes: Numbers represent row percentages (e.g. 32.9% of White cohort members were low social media users). Percentages account for survey design and weights. Ethnicity difference in social media use  $p < .05$ .

## Survey questions

About what time do you usually **go to sleep** on a **school night**?

- 1 Before 9 pm
- 2 9 - 9:59 pm
- 3 10 – 10:59 pm
- 4 11 - midnight
- 5 After midnight

About what time do you usually **wake up** in the morning on a **school day**?

- 1 Before 6 am
- 2 6 - 6:59 am
- 3 7 – 7:59 am
- 4 8 - 8:59 am
- 5 After 9 am

About what time do you usually **go to sleep** on the nights when you **do not have school** the next day?

- 1 Before 9 pm
- 2 9 - 9:59 pm
- 3 10 - 10:59 pm
- 4 11 - midnight
- 5 After midnight

About what time do you **wake up** in the morning on the days when you **do not have school**?

- 1 Before 8 am
- 2 8 - 8:59 am
- 3 9 – 9:59 am
- 4 10 - 10:59 am
- 5 11 - 11:59 am
- 6 After Middy

During the last four weeks, how long did it usually take for you to fall asleep?

- 1 0-15 minutes
- 2 16-30 minutes
- 3 31-45 minutes
- 4 46-60 minutes
- 5 More than 60 minutes

During the last four weeks, how often did you awaken during your sleep time and have trouble falling back to sleep again?

- 1 All of the time
- 2 Most of the time
- 3 A good bit of the time
- 4 Some of the time
- 5 A little of the time
- 6 None of the time

On a normal week day during term time, how many hours do you spend on social networking or messaging sites or Apps on the internet such as Facebook, Twitter and WhatsApp?

- 1 None
- 2 Less than half an hour
- 3 Half an hour to less than 1 hour
- 4 1 hour to less than 2 hours
- 5 2 hours to less than 3 hours
- 6 3 hours to less than 5 hours

- 1
- 2 7 5 hours to less than 7 hours
- 3 8 7 hours or more
- 4
- 5
- 6
- 7
- 8
- 9
- 10
- 11
- 12
- 13
- 14
- 15
- 16
- 17
- 18
- 19
- 20
- 21
- 22
- 23
- 24
- 25
- 26
- 27
- 28
- 29
- 30
- 31
- 32
- 33
- 34
- 35
- 36
- 37
- 38
- 39
- 40
- 41
- 42
- 43
- 44
- 45
- 46
- 47
- 48
- 49
- 50
- 51
- 52
- 53
- 54
- 55
- 56
- 57
- 58
- 59
- 60

For peer review only

Figures

Figure 1. Odds Ratios of sleep outcomes for low, high & very high daily social media users

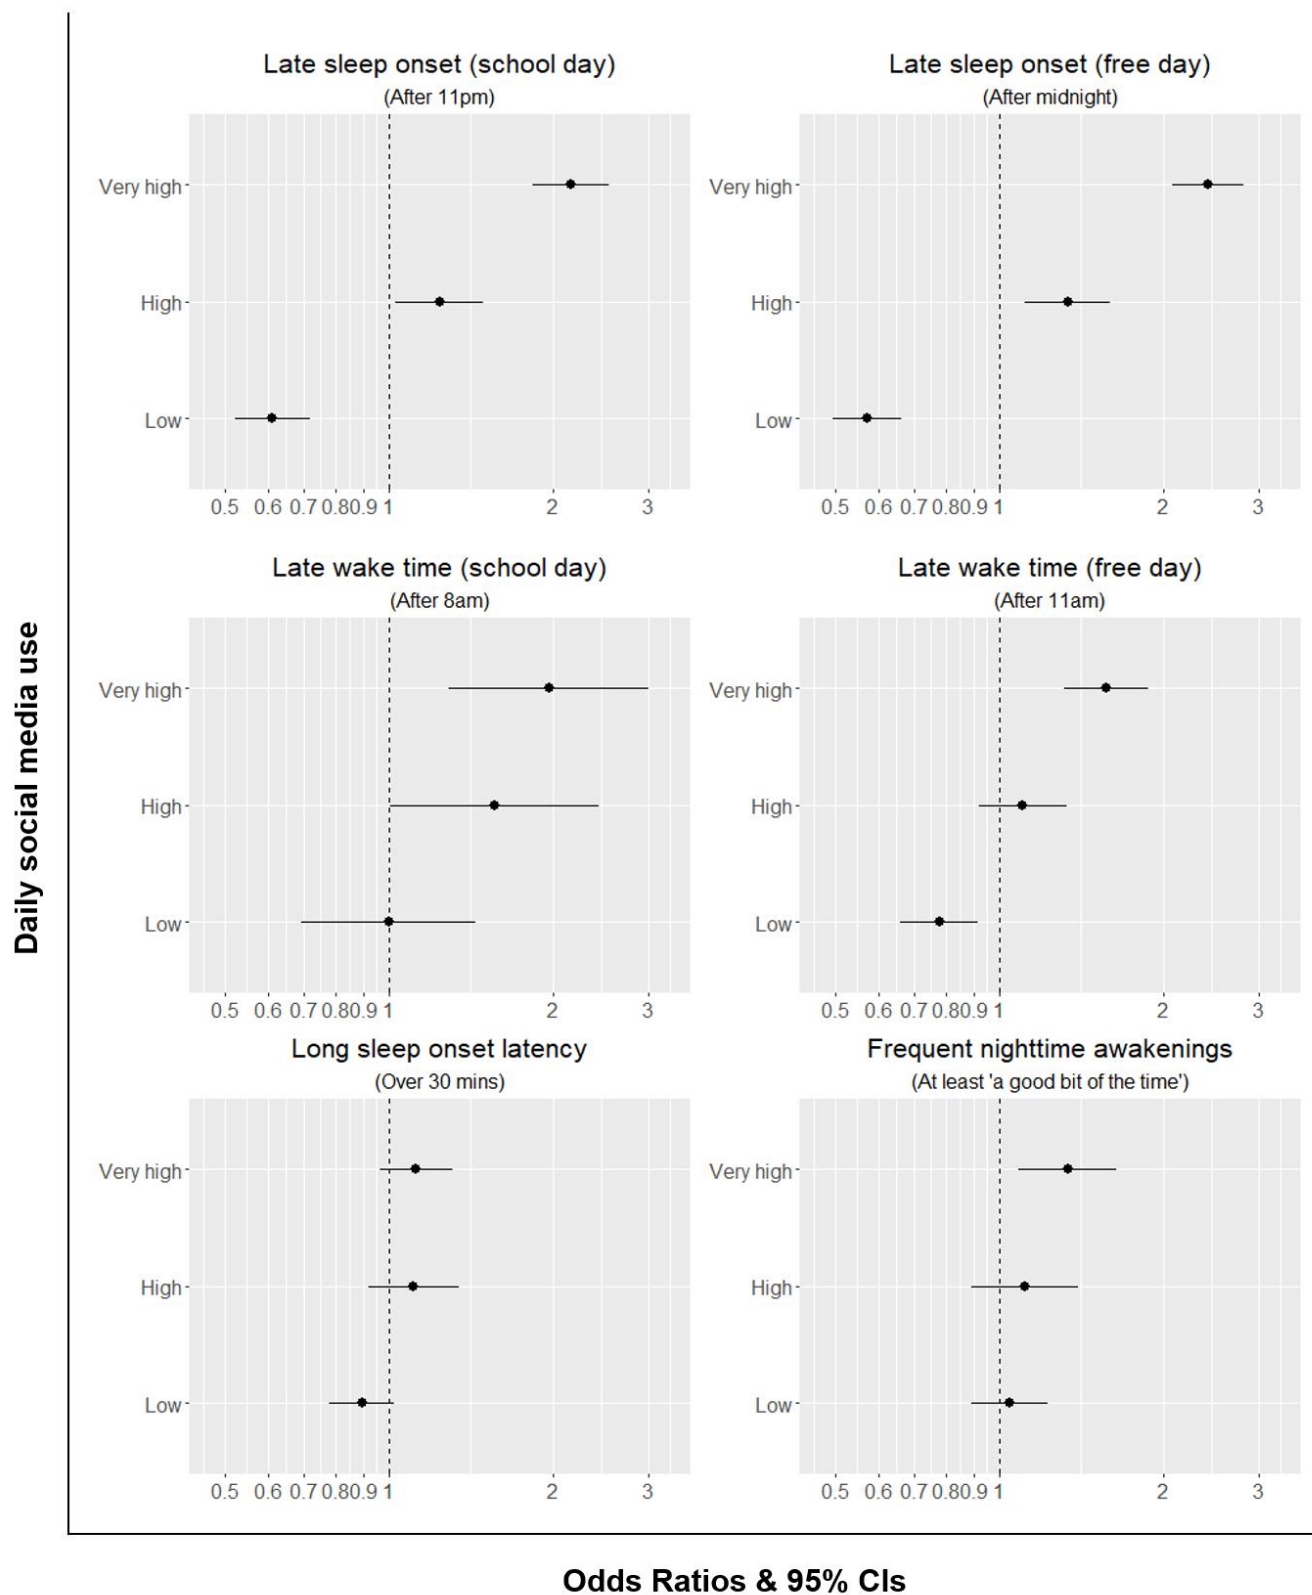

Notes: Odds Ratios measure how much higher or lower the odds of a given sleep outcome are for each category of social media user (Low, <1h; High, 3-5h; Very high, 5+h) compared to typical users (1-3h). Odds Ratios and 95% Confidence Intervals greater than 1 indicate higher odds; those below 1 indicate lower odds. Odds Ratios are adjusted to control for: exact age, sex, ethnic minority status, family income, number of siblings in household, presence of both parents, parent age, Strengths and Difficulties score, Mood and Feelings score, self-esteem, general health, social support and physical activity.



STROBE Statement—Checklist of items that should be included in reports of *cross-sectional studies*

|                              | Item No | Recommendation                                                                                                                                                                                               | Page No |
|------------------------------|---------|--------------------------------------------------------------------------------------------------------------------------------------------------------------------------------------------------------------|---------|
| <b>Title and abstract</b>    | 1       | (a) Indicate the study's design with a commonly used term in the title or the abstract                                                                                                                       | 1       |
|                              |         | (b) Provide in the abstract an informative and balanced summary of what was done and what was found                                                                                                          | 2       |
| <b>Introduction</b>          |         |                                                                                                                                                                                                              |         |
| Background/rationale         | 2       | Explain the scientific background and rationale for the investigation being reported                                                                                                                         | 4-6     |
| Objectives                   | 3       | State specific objectives, including any prespecified hypotheses                                                                                                                                             | 5-6     |
| <b>Methods</b>               |         |                                                                                                                                                                                                              |         |
| Study design                 | 4       | Present key elements of study design early in the paper                                                                                                                                                      | 7       |
| Setting                      | 5       | Describe the setting, locations, and relevant dates, including periods of recruitment, exposure, follow-up, and data collection                                                                              | 7       |
| Participants                 | 6       | (a) Give the eligibility criteria, and the sources and methods of selection of participants                                                                                                                  | 7       |
| Variables                    | 7       | Clearly define all outcomes, exposures, predictors, potential confounders, and effect modifiers. Give diagnostic criteria, if applicable                                                                     | 7-8     |
| Data sources/<br>measurement | 8*      | For each variable of interest, give sources of data and details of methods of assessment (measurement). Describe comparability of assessment methods if there is more than one group                         | 7-8     |
| Bias                         | 9       | Describe any efforts to address potential sources of bias                                                                                                                                                    | NA      |
| Study size                   | 10      | Explain how the study size was arrived at                                                                                                                                                                    | 7       |
| Quantitative variables       | 11      | Explain how quantitative variables were handled in the analyses. If applicable, describe which groupings were chosen and why                                                                                 | 8       |
| Statistical methods          | 12      | (a) Describe all statistical methods, including those used to control for confounding                                                                                                                        | 9       |
|                              |         | (b) Describe any methods used to examine subgroups and interactions                                                                                                                                          | NA      |
|                              |         | (c) Explain how missing data were addressed                                                                                                                                                                  | 9       |
|                              |         | (d) If applicable, describe analytical methods taking account of sampling strategy                                                                                                                           | 9       |
|                              |         | (e) Describe any sensitivity analyses                                                                                                                                                                        | 9       |
| <b>Results</b>               |         |                                                                                                                                                                                                              |         |
| Participants                 | 13*     | (a) Report numbers of individuals at each stage of study—eg numbers potentially eligible, examined for eligibility, confirmed eligible, included in the study, completing follow-up, and analysed            | 7       |
|                              |         | (b) Give reasons for non-participation at each stage                                                                                                                                                         | NA      |
|                              |         | (c) Consider use of a flow diagram                                                                                                                                                                           | NA      |
| Descriptive data             | 14*     | (a) Give characteristics of study participants (eg demographic, clinical, social) and information on exposures and potential confounders                                                                     | 8-9     |
|                              |         | (b) Indicate number of participants with missing data for each variable of interest                                                                                                                          | 10      |
| Outcome data                 | 15*     | Report numbers of outcome events or summary measures                                                                                                                                                         | 8-9     |
| Main results                 | 16      | (a) Give unadjusted estimates and, if applicable, confounder-adjusted estimates and their precision (eg, 95% confidence interval). Make clear which confounders were adjusted for and why they were included | 10-12   |

|                          |    |                                                                                                                                                                            |       |
|--------------------------|----|----------------------------------------------------------------------------------------------------------------------------------------------------------------------------|-------|
|                          |    | (b) Report category boundaries when continuous variables were categorized                                                                                                  | 8     |
|                          |    | (c) If relevant, consider translating estimates of relative risk into absolute risk for a meaningful time period                                                           | NA    |
| Other analyses           | 17 | Report other analyses done—eg analyses of subgroups and interactions, and sensitivity analyses                                                                             | NA    |
| <b>Discussion</b>        |    |                                                                                                                                                                            |       |
| Key results              | 18 | Summarise key results with reference to study objectives                                                                                                                   | 13    |
| Limitations              | 19 | Discuss limitations of the study, taking into account sources of potential bias or imprecision. Discuss both direction and magnitude of any potential bias                 | 15-16 |
| Interpretation           | 20 | Give a cautious overall interpretation of results considering objectives, limitations, multiplicity of analyses, results from similar studies, and other relevant evidence | 14-15 |
| Generalisability         | 21 | Discuss the generalisability (external validity) of the study results                                                                                                      | 16    |
| <b>Other information</b> |    |                                                                                                                                                                            |       |
| Funding                  | 22 | Give the source of funding and the role of the funders for the present study and, if applicable, for the original study on which the present article is based              | 17    |

\*Give information separately for exposed and unexposed groups.

**Note:** An Explanation and Elaboration article discusses each checklist item and gives methodological background and published examples of transparent reporting. The STROBE checklist is best used in conjunction with this article (freely available on the Web sites of PLoS Medicine at <http://www.plosmedicine.org/>, Annals of Internal Medicine at <http://www.annals.org/>, and Epidemiology at <http://www.epidem.com/>). Information on the STROBE Initiative is available at [www.strobe-statement.org](http://www.strobe-statement.org).

# BMJ Open

## Social media use and adolescent sleep patterns: cross-sectional findings from the UK Millennium Cohort Study

|                                 |                                                                                                                                                                                      |
|---------------------------------|--------------------------------------------------------------------------------------------------------------------------------------------------------------------------------------|
| Journal:                        | <i>BMJ Open</i>                                                                                                                                                                      |
| Manuscript ID                   | bmjopen-2019-031161.R1                                                                                                                                                               |
| Article Type:                   | Research                                                                                                                                                                             |
| Date Submitted by the Author:   | 16-Jul-2019                                                                                                                                                                          |
| Complete List of Authors:       | Scott, Holly; University of Glasgow, School of Psychology<br>Biello, Stephany; University of Glasgow, School of Psychology<br>Woods, HC; University of Glasgow, School of Psychology |
| <b>Primary Subject Heading</b>: | Paediatrics                                                                                                                                                                          |
| Secondary Subject Heading:      | Epidemiology                                                                                                                                                                         |
| Keywords:                       | Social media use, Sleep, Adolescents, Delayed bedtime, Sleep quality, Screen time                                                                                                    |
|                                 |                                                                                                                                                                                      |

SCHOLARONE™  
Manuscripts

1  
2  
3 **TITLE PAGE**  
4

5 **Title**

6  
7 Social media use and adolescent sleep patterns: cross-sectional findings from the UK  
8  
9 Millennium Cohort Study  
10

11  
12 **Author names**  
13

14 Holly Scott, MSc; Stephany M Biello, PhD; Heather Cleland Woods, PhD  
15  
16

17 **Author job titles & affiliation address**  
18

19 Holly Scott, PhD candidate

20  
21 Stephany M Biello, Professor & Depute Head of School

22  
23 Heather Cleland Woods, Lecturer  
24  
25

26 All authors have same institutional affiliation/address:

27  
28 School of Psychology, University of Glasgow, 62 Hillhead Street, Glasgow, G12 8QB.  
29  
30

31 **Corresponding author**  
32

33 Holly Scott, h.scott.1@research.gla.ac.uk, postal address as above.  
34  
35  
36  
37  
38  
39  
40  
41  
42  
43  
44  
45  
46  
47  
48  
49  
50  
51  
52  
53  
54  
55  
56  
57  
58  
59  
60

## ABSTRACT

### Objectives

This study examines associations between social media use and multiple sleep parameters in a large representative adolescent sample, controlling for a wide range of covariates.

### Design

The authors used cross-sectional data from the Millennium Cohort Study, a large nationally representative UK birth cohort study.

### Participants

Data from 11,872 adolescents (aged 13-15 years) were used in analyses.

### Methods

Six self-reported sleep parameters captured sleep timing and quality: sleep onset and wake times (on school days and free days), sleep onset latency (time taken to fall asleep) and trouble falling back asleep after nighttime awakening. Binomial logistic regressions investigated associations between daily social media use and each sleep parameter, controlling for a range of relevant covariates.

### Results

Average social media use was 1 to <3h per day (31.6%, n = 3720). 33.7% were classed as low users (<1h; n = 3986), 13.9% were high users (3 to <5h; n = 1602) and 20.8% were very high users (5+h; n = 2203). Girls reported spending more time on social media than boys. Overall, heavier social media use was associated with poorer sleep patterns, controlling for covariates. For example, very high social media users were more likely than comparable average users to report late sleep onset (OR = 2.14, 95% CI: 1.83 to 2.50) and wake times (OR = 1.97, 95% CI: 1.32 to 2.93) on school days, and trouble falling back asleep after nighttime awakening (OR = 1.36, 95% CI: 1.10 to 1.66).

### Conclusions

This study provides a normative profile of UK adolescent social media use and sleep. Results indicate statistically and practically significant associations between social media use and sleep patterns, particularly late sleep onset. Sleep education and interventions can focus on supporting young people to balance online interactions with an appropriate sleep schedule that allows sufficient sleep on school nights..

## STRENGTHS AND LIMITATIONS

- Provides a current normative profile of social media use and sleep in UK adolescents
- Moves beyond generic “screen time” to examine social media specifically
- Uses data from a large representative sample, including comprehensive covariates
- Uses self-reported measures of social media use and sleep patterns
- Measures only duration of social media use, rather than content and context

## INTRODUCTION

There is significant current attention towards the possible impact of screentime and social media on our adolescents' health. However, the lack of empirical evidence to support policy and practice development in this area has been consistently voiced by clinicians and researchers. For example, at the UK House of Commons Science and Technology Committee inquiry into the impact of social media and screen-use on young people's health use in adolescence, the Royal College of Paediatrics and Child Health (RCPCH) urged the UK government as a matter of priority to develop guidance for health practitioners along the same lines as the American Academy of Paediatrics (AAP) but importantly based on UK data<sup>1</sup>. They also argue along with other researchers that there is a need to refocus away from correlations between generic terms such as "screentime" and poor wellbeing, towards meaningfully quantifying how various types of technology use impact on different areas of child and adolescent health and wellbeing. This study presents UK data that provide a nationally representative profile of current adolescent social media use, and takes a data-driven approach to quantify sleep patterns for high and very high users relative to average users.

This study focuses on sleep, which – despite often being overlooked in public health messages and education interventions<sup>3 4</sup> – is increasingly recognised as a key component of wider health and wellbeing<sup>5</sup>. Adolescent sleep is an important public health issue, as insufficient sleep is highly prevalent in this age group and has implications for mental health, obesity, academic performance and safety<sup>6</sup>. With the majority of adolescents reporting insufficient sleep to function properly or to meet recommended guidelines<sup>7 8</sup>, there is growing concern that social media may be a contributing factor for today's teenagers. For example, the potential for 24/7 social media interactions may exacerbate the existing conflict of early school start times with naturally delayed adolescent rhythms and other social and educational demands<sup>6 9 10</sup>. As a highly relevant issue for paediatric practice, there is a clear need for UK evidence to inform and update decision making in medical practice and policy to address this current issue in adolescent sleep.

This study responds to this need, presenting large-scale UK data on adolescent sleep and social media use, whilst addressing a number of existing gaps in available international

1  
2  
3 evidence. In addition to providing much-needed UK evidence, the current approach also  
4 addresses the need for evidence that: (1) examines social media specifically, rather than  
5 generic screentime; (2) isolates effects for a range of sleep parameters by accounting for an  
6 extensive range of covariates; (3) frames these effects within the context of current  
7 adolescent social media norms to provide meaningful comparisons. The current approach to  
8 ensure that this evidence can meaningfully inform policy and practice by addressing each of  
9 these needs is discussed further below.  
10  
11  
12  
13  
14  
15  
16

17 Firstly, it is important for available evidence to examine social media individually, rather  
18 than aggregating these interactions and other media use under the umbrella term  
19 “screentime”. A recent large-scale US study indicated a significant but modest effect for  
20 overall screentime and sleep, and called for future research to examine effects for specific  
21 technologies <sup>11</sup>. In particular, the interactive nature of social media presents uniquely  
22 relevant issues for adolescent sleep compared to other forms of screentime or traditional  
23 media <sup>7 12</sup>. Although facilitated by screens, social media interactions are underpinned by the  
24 same drivers as any social interaction, with a desire for inclusion and belonging mixing with  
25 concerns over violating social expectations or etiquette <sup>13</sup>. These concerns can make it  
26 difficult to disengage from social media at bedtime, with some adolescents identifying this  
27 as a cause of delayed sleep onset and daytime tiredness <sup>13</sup>. These unique social and  
28 emotional aspects of online interactions underline the importance of examining social  
29 media use specifically, in relation to adolescent sleep outcomes.  
30  
31  
32  
33  
34  
35  
36  
37  
38  
39  
40  
41  
42

43 Secondly, to meaningfully inform an evidence-based response to social media use, research  
44 must examine multiple sleep parameters and isolate these effects by controlling for an  
45 extensive range of relevant covariates. This is crucial to assess the practical significance of  
46 underlying direct effects <sup>11</sup> and to identify which aspects of adolescent sleep merit attention  
47 to social media use in practice and policy. Available research on social media use and sleep  
48 is often left questioning whether reported effects could be explained by other individual  
49 factors: for example if more anxious, depressed or sedentary adolescents may tend to both  
50 use social media more and report poorer sleep <sup>12 14</sup>. Individual studies that have controlled  
51 for specific groups of covariates generally suggest that associations do persist <sup>15 16</sup>. However,  
52 there remains a need for large-scale evidence that addresses a wide range of covariates  
53  
54  
55  
56  
57  
58  
59  
60



1  
2  
3 simultaneously, to more robustly establish which dimensions of sleep have a direct  
4 association with social media use and which reflect another underlying issue (e.g. anxious or  
5 depressive symptoms).  
6  
7  
8  
9

10 This type of evidence is required to invest time and resources effectively, by identifying  
11 which sleep complaints may benefit from directly addressing social media use. For example,  
12 a range of sleep complaints from insufficient sleep to problems initiating or maintaining  
13 sleep have been examined in relation to social media use. In terms of sleep duration, time  
14 spent using social media may displace sleep directly or displace other daytime activities  
15 (such as homework) that are then delayed and disrupt nighttime routines<sup>9 17</sup>. Social media  
16 use may also impact on the quality of sleep via increased arousal, not simply through light  
17 exposure<sup>18</sup>, but particularly via cognitive and social activity<sup>12 14 19</sup>. Given these different  
18 potential mechanisms, it is therefore important to examine social media use in relation to a  
19 range of sleep parameters, to identify which of these links have the most practical  
20 significance after accounting for relevant factors.  
21  
22  
23  
24  
25  
26  
27  
28  
29  
30

31 Thirdly, evidence should frame these effects within the context of current norms for  
32 adolescent social media use. Research to date has tended to focus on problematic or  
33 "addicted" social media users<sup>10 20</sup>, or to compare outcomes for the highest users against the  
34 lowest users<sup>15 17 21</sup>. In contrast, first establishing what constitutes typical use and then  
35 comparing outcomes for relatively higher or lower users against this reference point can  
36 support more meaningful conclusions. This data-driven approach avoids imposing arbitrary  
37 or quickly outdated cut-offs, taking into account recent rapid increases in social media use  
38<sup>22</sup>. Comparing sleep patterns for higher users against average users can better support  
39 practical and realistic discussions on best practice, that consider the context of current  
40 adolescent social media norms.  
41  
42  
43  
44  
45  
46  
47  
48  
49  
50

51 This study targets these existing gaps in available international evidence, while providing  
52 much-needed large-scale UK evidence. It examines associations between social media use  
53 and multiple sleep parameters in a large, nationally representative adolescent sample: the  
54 UK Millennium Cohort Study<sup>23</sup>. It first investigates current norms in adolescent social media  
55 use to establish the average level of daily use and the prevalence of comparatively high use.  
56  
57  
58  
59  
60

1  
2  
3 It then examines which sleep parameters are associated with social media use, isolating  
4 these effects by controlling for extensive covariates and quantifying effects for higher users  
5 relative to average users. This aims to provide rigorous and meaningful evidence to inform  
6 practice and policy to support healthy adolescent sleep and social media use.  
7  
8  
9

## 10 11 12 **METHODS**

### 13 14 **Participants**

15  
16 The UK Millennium Cohort Study is a nationally representative, multidisciplinary survey  
17 which aims to explore the influence of family context on child and adolescent development  
18 and outcomes. The survey covers a broad range of domains, such as parenting, housing,  
19 poverty and health. It consists of a random 2-stage sample drawn from all live UK births in  
20 the 12-month period starting 1 September 2000 in England and Wales and 1 December  
21 2000 in Scotland and Northern Ireland, identified through the Child Benefit register <sup>23</sup>. The  
22 clustered sample is drawn from a disproportionately stratified sample of electoral wards  
23 (local areas) to provide adequate representation of areas with higher concentrations of  
24 minority ethnic and disadvantaged families. Parents completed the first survey sweep in  
25 2001 when their child was aged 9 months, with 18,818 cohort members. Children also  
26 completed surveys from age 7 (sweep 4) onwards. The most recent survey (sweep 6 at  
27 around age 14) gathered self-report data from 11,872 cohort members, including questions  
28 on their typical social media use and sleep patterns. Parents were required to give written  
29 consent to complete the parent survey and for the interviewer to invite the cohort member  
30 to participate in the young person survey. Cohort members then also had to give verbal  
31 consent to complete the young person survey, which was self-completed on the  
32 interviewer's tablet.  
33  
34  
35  
36  
37  
38  
39  
40  
41  
42  
43  
44  
45  
46  
47  
48

### 49 **Materials**

50 The current analyses make use of available data from the UK Millennium Cohort Study,  
51 which measured social media use and sleep using single-item self-report questions.  
52 Although not validated questionnaire measures, these survey questions do provide a  
53 snapshot of the subjective experience of sleep and social media use in this large  
54 representative sample, capturing a range of sleep habits and the typical time spent using  
55 social media each day.  
56  
57  
58  
59  
60

## Social media use

Participants indicated how much time they spent using social media on a typical weekday, choosing from 8 response categories (ranging from 0 hours to 7+ hours) to answer the following question: “On a normal week day during term time, how many hours do you spend on social networking or messaging sites or Apps on the internet such as Facebook, Twitter and WhatsApp?”

## Sleep parameters

Participants reported typical sleep habits through six single items (each with 5 or 6 response categories) that assessed: sleep onset and wake times (on school days and free days, separately), sleep onset latency (time taken to fall asleep) and trouble falling back asleep after nighttime awakening. The Supplementary Materials provide a full list of items and response categories.

## Covariates

In addition, the following relevant covariates (identified based on literature) had available data in the UK Millennium Cohort Study: demographics (ethnic minority status, OECD equivalised weekly family income); family composition (number of siblings in household, presence of both parents, age of primary parent/carer responder); psychosocial adjustment (using the parent-report Strengths and Difficulties Questionnaire)<sup>24</sup>; depressive symptoms (using the Short Mood and Feelings Questionnaire)<sup>25</sup>; self-esteem (using a shortened and adapted version of the Rosenberg Self-Esteem Scale)<sup>26</sup>; general health (single item), social support (three items) and physical activity (single item).

## Data analysis

Since the aim of the study was to compare sleep outcomes for high and low users versus average users, based on the distribution we initially collapsed responses into three categories: under 1 hour for ‘low’ users (33.7%), 1 to <3 hours for ‘average’ users (31.6%), and 3 hours or more for ‘high’ users (34.7%). Given the broad range covered by this ‘high’ user category (including responses of 3 to <5, 5 to <7 and 7+ hours), and with sufficient numbers, we separated this into ‘high’ (3 to <5 hours; 13.9%) and ‘very high’ users (5+ hours; 20.8%) to allow more detailed exploration.

We collapsed responses for each sleep measure into binary outcomes. For poor sleep quality, these outcomes were: sleep onset latency over 30 minutes (commonly used to indicate poor sleep quality)<sup>27 28</sup> and difficulty falling asleep following nighttime awakenings at least 'a good bit of the time'. For late sleep onset and wake times, we took a data-driven approach to identify meaningful cut-off points, which were defined as later than average (including responses in categories later than the median response category). Table 1 summarises the resulting criteria for each sleep outcome and associated prevalence rates.

**Table 1** Social media use and sleep outcomes: criteria and prevalence

| Variable                                              | Criteria                          | Prevalence (%) |        |       |
|-------------------------------------------------------|-----------------------------------|----------------|--------|-------|
|                                                       |                                   | Male           | Female | Total |
| <b>Daily social media use</b>                         |                                   |                |        |       |
| Low                                                   | < 1 hour                          | 43.8           | 22.8   | 33.7  |
| Average                                               | 1 to <3 hours                     | 32.1           | 31.1   | 31.6  |
| High                                                  | 3 to <5 hours                     | 10.4           | 17.7   | 13.9  |
| Very high                                             | 5+ hours                          | 13.7           | 28.4   | 20.8  |
| <b>Sleep outcomes</b>                                 |                                   |                |        |       |
| Late sleep onset (school day)                         | After 11pm                        | 25.5           | 26.5   | 26.0  |
| Late sleep onset (free day)                           | After midnight                    | 35.2           | 32.1   | 33.7  |
| Late wake time (school day)                           | After 8am                         | 5.3            | 2.7    | 4.0   |
| Late wake time (free day)                             | After 11am                        | 22.5           | 21.5   | 22.0  |
| Long sleep onset latency                              | Over 30 minutes                   | 31.5           | 37.0   | 34.1  |
| Trouble falling back asleep after nighttime awakening | At least 'a good bit of the time' | 16.9           | 25.7   | 21.1  |

Notes: Percentages account for survey design and weights. Criteria for late sleep onset and wake times defined as later than the median response category. Gender difference in daily social media use, late wake time (school day), long sleep onset latency and trouble falling back asleep after nighttime awakening  $p < .001$ ; gender difference in late sleep onset (free day)  $p < .01$ . For a breakdown of social media use by other demographics (household income and ethnicity), see the Supplementary Materials.

Separate binomial logistic regression models predicted Odds Ratios of each sleep outcome for low, high and very high social media users, compared to average users. We ran models that controlled only for exact age and sex, followed by models that further controlled for measures of demographics, family characteristics, psychological wellbeing and health (see Materials section for full details). All analyses allowed for the complex survey design (with

1  
2  
3 its clustered, stratified sample) and used longitudinal weights to account for non-random  
4 longitudinal attrition from the sample, using the 'survey' and 'srvyr' packages in R<sup>29-31</sup>.

5  
6  
7  
8 Multiple imputation was performed to account for missing data, reducing bias and  
9 increasing power<sup>32</sup>. The overall missing data rate was 2.8%, ranging from 0.0% to 6.0% for  
10 individual measures, with most measures below 5%. We make the assumption that data are  
11 missing at random (i.e. that patterns of missingness can be explained by other variables  
12 available in the data;<sup>32</sup>). All variables, including covariates, were used in the imputation  
13 model, which was run using R package 'mice'<sup>33</sup>. Estimates were combined across 10  
14 imputed data sets (each produced through 10 iterations). Results were similar for analyses  
15 on multiply imputed and complete case data, so only multiply imputed analysis is presented  
16 here.  
17  
18  
19  
20  
21  
22  
23  
24  
25

## 26 RESULTS

27  
28 The median time spent using social media on a typical day was 1 to <3 hours (32% of  
29 adolescents); however, 21% used social media for at least 5 hours. Girls tended to use social  
30 media more than boys (see Table 1).  
31  
32  
33  
34

35 Median sleep onset times were 10-11pm on school days (with 26% falling asleep later than  
36 this) and between 11pm and midnight on free days (with 34% falling asleep later; see Table  
37 1). Median wake times were 7-8am on school days (with only 4% waking later than this) and  
38 10-11am on free days (with 22% waking later). Boys were more likely to fall asleep late on  
39 free days and wake up late on school days. In measures of poor sleep quality, 34% typically  
40 took longer than 30 minutes to fall asleep and 21% reported difficulties falling asleep  
41 following nighttime awakenings at least 'a good bit of the time'. Girls were more likely to  
42 have long sleep onset latency and trouble falling back asleep after nighttime awakening.  
43  
44  
45  
46  
47  
48  
49  
50

51 Separate binomial logistic regression models explored whether odds of each sleep outcome  
52 differed for low, high and very high social media users, compared to average users (1 to <3  
53 h). First, models controlled for exact age and sex (see Table 2). Very high social media use  
54 (5+ h) was associated with higher odds of all six sleep outcomes. High social media use (3 to  
55 <5 h) was associated with higher odds of all outcomes except for late rise times on free  
56  
57  
58  
59  
60

days. Low social media use (<1 h) was associated with lower odds of late sleep onset on school- and free- days, and late wake times on free days.

**Table 2** Binomial logistic regressions (adjusting only for age & sex)

|                                | Low: <1 h            |           | High: 3 to <5 h      |           | Very high: 5+ h      |          |
|--------------------------------|----------------------|-----------|----------------------|-----------|----------------------|----------|
|                                | OR<br>(95% CI)       | <i>p</i>  | OR<br>(95% CI)       | <i>p</i>  | OR<br>(95% CI)       | <i>p</i> |
| Late sleep onset (school days) | 0.63<br>(0.53, 0.75) | < .001    | 1.38<br>(1.16, 1.65) | < .001    | 2.75<br>(2.38, 3.18) | < .001   |
| Late sleep onset (free days)   | 0.6<br>(0.51, 0.7)   | < .001    | 1.44<br>(1.19, 1.74) | < .001    | 3.05<br>(2.63, 3.54) | < .001   |
| Late wake time (school days)   | 1.12<br>(0.77, 1.62) | <i>ns</i> | 1.63<br>(1.05, 2.53) | < .05     | 2.49<br>(1.62, 3.83) | < .001   |
| Late wake time (free days)     | 0.81<br>(0.69, 0.96) | < .05     | 1.16<br>(0.97, 1.39) | <i>ns</i> | 1.82<br>(1.54, 2.16) | < .001   |
| Sleep Onset Latency > 30 mins  | 0.92<br>(0.8, 1.05)  | <i>ns</i> | 1.24<br>(1.04, 1.49) | < .05     | 1.48<br>(1.27, 1.71) | < .001   |
| Frequent nighttime awakenings  | 1.06<br>(0.9, 1.26)  | <i>ns</i> | 1.31<br>(1.07, 1.61) | < .05     | 2.11<br>(1.75, 2.55) | < .001   |

Notes: See Table 1 for criteria and prevalence of each sleep outcome. Odds Ratios measure how much higher or lower the odds of a given sleep outcome are for each category of social media user (Low, <1h; High, 3 to <5h; Very high, 5+h) compared to the reference category (Average users, 1 to <3h). Odds Ratios and 95% Confidence Intervals greater than 1 indicate higher odds; those below 1 indicate lower odds. Odds Ratios are adjusted to control for exact age & sex. *ns* = non-significant.

Further modelling then controlled for a more comprehensive set of covariates (see Table 3, with note detailing list of covariates). High social media use was no longer significantly associated with long sleep onset latency or frequent nighttime awakenings. Very high social media was no longer significantly associated with long sleep onset latency; however, its association with frequent nighttime awakenings remained significant but smaller. Patterns of significant associations for late sleep onset and wake times remained unchanged, although effect sizes were reduced, particularly for very high social media use.

**Table 3** Binomial logistic regressions (with further adjustments for covariates)

|                                | Low: <1 h            |           | High: 3 to <5 h      |           | Very high: 5+ h      |           |
|--------------------------------|----------------------|-----------|----------------------|-----------|----------------------|-----------|
|                                | OR<br>(95% CI)       | <i>p</i>  | OR<br>(95% CI)       | <i>p</i>  | OR<br>(95% CI)       | <i>p</i>  |
| Late sleep onset (school days) | 0.61<br>(0.51, 0.73) | < .001    | 1.23<br>(1.02, 1.49) | < .05     | 2.14<br>(1.83, 2.5)  | < .001    |
| Late sleep onset (free days)   | 0.57<br>(0.49, 0.68) | < .001    | 1.32<br>(1.09, 1.6)  | < .01     | 2.41<br>(2.08, 2.79) | < .001    |
| Late wake time (school days)   | 1.04<br>(0.71, 1.5)  | <i>ns</i> | 1.56<br>(1.02, 2.4)  | < .05     | 1.97<br>(1.32, 2.93) | < .01     |
| Late wake time (free days)     | 0.79<br>(0.67, 0.93) | < .01     | 1.12<br>(0.92, 1.35) | <i>ns</i> | 1.57<br>(1.32, 1.87) | < .001    |
| Sleep Onset Latency > 30 mins  | 0.9<br>(0.78, 1.04)  | <i>ns</i> | 1.11<br>(0.92, 1.34) | <i>ns</i> | 1.12<br>(0.96, 1.32) | <i>ns</i> |
| Frequent nighttime awakenings  | 1.04<br>(0.88, 1.24) | <i>ns</i> | 1.08<br>(0.87, 1.35) | <i>ns</i> | 1.36<br>(1.1, 1.66)  | < .01     |

Notes: See Table 1 for criteria and prevalence of each sleep outcome. Reference category is Average (1 to <3h). Odds Ratios are adjusted to control for: exact age, sex, ethnic minority status, family income, number of siblings in household, presence of both parents in household, parent age, Strengths and Difficulties score, Mood and Feelings score, self-esteem, general health, social support and physical activity. *ns* = non-significant.

For ease of interpretation, we also transformed the resulting adjusted Odds Ratios from these covariate models into adjusted Relative Risks<sup>34</sup> (see Table 4). These summarise differences in *probabilities*, as opposed to odds, and can be interpreted more intuitively. For example, the adjusted relative risk of 1.68 indicates that an adolescent with very high social media use is 68% more likely to fall asleep after 11pm on school nights than a comparable adolescent (controlling for covariates) with average social media use.

**Table 4** Relative Risks (from covariate-adjusted models)

|  | Low: <1 h | High: 3 to <5 h | Very high: 5+ h |
|--|-----------|-----------------|-----------------|
|--|-----------|-----------------|-----------------|

|                                | RR (95% CI)          | <i>p</i>  | RR (95% CI)          | <i>p</i>  | RR (95% CI)          | <i>p</i>  |
|--------------------------------|----------------------|-----------|----------------------|-----------|----------------------|-----------|
| Late sleep onset (school days) | 0.67<br>(0.58, 0.78) | <.001     | 1.17<br>(1.02, 1.33) | <.05      | 1.68<br>(1.52, 1.84) | <.001     |
| Late sleep onset (free days)   | 0.66<br>(0.58, 0.75) | <.001     | 1.2<br>(1.06, 1.35)  | <.01      | 1.69<br>(1.57, 1.81) | <.001     |
| Late wake time (school days)   | 1.03<br>(0.72, 1.48) | <i>ns</i> | 1.54<br>(1.02, 2.29) | <.05      | 1.91<br>(1.3, 2.76)  | <.01      |
| Late wake time (free days)     | 0.83<br>(0.72, 0.95) | <.01      | 1.09<br>(0.94, 1.26) | <i>ns</i> | 1.41<br>(1.24, 1.59) | <.001     |
| Sleep Onset Latency > 30 mins  | 0.93<br>(0.84, 1.03) | <i>ns</i> | 1.07<br>(0.94, 1.21) | <i>ns</i> | 1.08<br>(0.97, 1.2)  | <i>ns</i> |
| Frequent nighttime awakenings  | 1.03<br>(0.89, 1.19) | <i>ns</i> | 1.07<br>(0.89, 1.28) | <i>ns</i> | 1.28<br>(1.09, 1.5)  | <.01      |

Notes: Relative Risks transformed from Odds Ratios in covariate-controlled binomial logistic regression models (see Table 3). Reference category is Average (1 to <3h). E.g. RR of 1.68 means very high users are 68% more likely to fall asleep late on school days than comparable average users. *ns* = non-significant.

## DISCUSSION

This study aimed to address calls from those working in policy and practice to establish a UK data driven profile of current adolescent daily social media use, and to examine links to a key component of wider adolescent health and wellbeing using multiple sleep parameters whilst accounting for a wide range of covariates, using data from a large nationally representative sample of UK adolescents. The results highlighted a wide range of reported daily social media use, with tertiles defining low, average and high use on a typical school day as <1 hour, 1 to <3 hours and 3+ hours respectively. This indicates generally heavier social media use compared to young adults<sup>21</sup> and provides a current normative profile for UK adolescents. One in five adolescents were classed as very high users, spending 5+ hours using social media on a typical school day, whereas two thirds of the sample used social media for less than 3 hours. This provides a data-driven profile of use to support decision-making, rather than relying on assumptions around prevalence of high use. In line with previous studies, girls tended to spend more time on social media than boys<sup>35 36</sup> and report



1  
2  
3 poorer sleep quality <sup>37 38</sup>. This reinforces the importance of controlling for gender when  
4 examining these associations, and highlights the need for continued work to explore the  
5 sleep implications of *how* adolescent boys and girls spend their time on social media (with  
6 previous evidence of gender differences in preferred platforms, motivations and self-  
7 presentation <sup>35 36 39</sup>).

8  
9  
10  
11  
12  
13  
14 In terms of sleep timing, social media use remained significantly associated with late sleep  
15 onset and wake times after controlling for covariates, with the strongest effect for sleep  
16 onset. Very high social media users were roughly 70% more likely than comparable average  
17 users to fall asleep later than average, i.e. after 11pm on school days and after midnight on  
18 free days. Low social media users were least likely to fall asleep late, indicating that unlike  
19 mental wellbeing, optimal outcomes for sleep are associated with minimal – not moderate –  
20 use <sup>40</sup>. These findings are consistent with the idea that social media displaces sleep: either  
21 directly or indirectly <sup>9 17</sup>. Direct sleep displacement may be particularly likely on school days,  
22 especially for very high users, since limited social media access during school hours means  
23 that at least part of this daily time on social media is likely to take place close to bedtime.  
24 Bedtime social media use can delay sleep onset <sup>14</sup>, with some adolescents reporting  
25 difficulties disengaging from social media to sleep <sup>13</sup>. A similar process could also indirectly  
26 delay sleep onset, if other daytime activities (e.g. homework) are delayed due to a sense of  
27 urgency to check and respond to social media notifications. This link to later sleep onset is a  
28 particular concern on school days, as late school day bedtimes longitudinally predict poorer  
29 academic and emotional outcomes <sup>41</sup>. Whilst the survey question aimed to measure sleep  
30 onset time by asking what time participants “go to sleep”, some participants may have  
31 reported the time that they get into bed, in which case actual sleep onset would be even  
32 further delayed<sup>42</sup>.

33  
34  
35  
36  
37  
38  
39  
40  
41  
42  
43  
44  
45  
46  
47  
48  
49  
50 Social media use was also associated with later wake times on school days (for both high  
51 and very high users) and on free days (for very high users). This overall pattern of later sleep  
52 timing amongst heavier social media users could be driven partly by circadian factors, if  
53 adolescents with a natural preference for later sleep timing use social media to fill time in  
54 the late evening until they feel sleepy. This possibility merits further investigation.  
55  
56  
57  
58  
59 Alternatively, this later sleep timing could suggest that heavier social media users may  
60

1  
2  
3 compensate for later sleep onset with later wake times that still allow sufficient sleep. This  
4 compensation may be possible on free days, with flexible rise times. However, on school  
5 days only 4% of adolescents reported late wake times (after 8am), as fixed rise times mean  
6 that later sleep onset effectively equates to shorter sleep opportunity on school days<sup>6,41</sup>.  
7  
8 Consequently, these slightly later rise times are unlikely to fully compensate for delayed  
9 sleep onset on school days and suggest sleep restriction in a population where sleep need is  
10 high<sup>6</sup>. Across the sample, this observed pattern of later sleep onset and rise times on free  
11 days compared to school days is consistent with well-established delays to the circadian  
12 rhythm during this developmental period<sup>43,44</sup>, with growing pressure on policymakers to  
13 delay school start times to better align with adolescent body clocks<sup>45</sup>.  
14  
15  
16  
17  
18  
19  
20  
21  
22

23 Delayed sleep onset is therefore a key issue to target in relation to adolescents' social media  
24 use. The current cross-sectional study cannot establish causality; however, some  
25 adolescents do report delaying bedtimes as a result of social media use<sup>13,46</sup>. Adolescent  
26 sleep interventions should therefore consider assessing the impact of social media use on  
27 sleep schedules as standard. Further research can explore adolescents' motivations for  
28 prioritising social media over other needs, including sleep<sup>13</sup>, and identify factors that lead  
29 some individuals to struggle with this more than others. This can inform efforts to  
30 effectively support young people to balance online interactions (and the benefits they can  
31 offer;<sup>40,47,48</sup>) with an appropriate and consistent sleep schedule across the week,  
32 particularly to allow sufficient sleep on school nights. By helping to combat insufficient  
33 sleep, this can have a positive impact on adolescent physical and mental health, daytime  
34 functioning and academic performance, addressing a significant health and educational  
35 burden<sup>6</sup>.  
36  
37  
38  
39  
40  
41  
42  
43  
44  
45  
46  
47

48 In terms of sleep quality, very high social media users were more likely to experience  
49 nighttime awakenings than comparable average users, whereas the effect for long sleep  
50 onset latency was fully explained by covariates. Previous studies have found a significant  
51 association between social media use and measures of sleep disturbance (including long  
52 sleep onset latency and difficulty falling asleep) when controlling for: age and sex<sup>19</sup>;  
53 sociodemographic measures<sup>21</sup>; and sleep hygiene behaviours<sup>15</sup>. The current more  
54 extensive set of covariates also included measures of psychological wellbeing (depression  
55  
56  
57  
58  
59  
60

1  
2  
3 and psychosocial adjustment), which were strong predictors of long sleep onset latency and  
4 have been shown to be linked to generic screentime in previous work <sup>40</sup>. Therefore,  
5 considering previous and current findings together, this suggests that although adolescents  
6 who spend more time on social media do tend to take longer to fall asleep, both these  
7 behaviours could reflect underlying aspects of wellbeing, with depression and anxiety linked  
8 to both poor sleep quality and social media use <sup>16</sup>. This is consistent with evidence that  
9 sleep onset latency and pre-sleep cognitive arousal is predicted by underlying concerns  
10 about potentially missing out, rather than social media behaviour itself <sup>14</sup>. Since the purpose  
11 of this study was to isolate and quantify associations between social media use and sleep,  
12 the current approach of including wellbeing measures as covariates provided this insight  
13 into which sleep associations do and do not persist independent of wellbeing and other  
14 covariates. However, future studies can specifically examine in more detail which aspects of  
15 mental health and wellbeing may mediate or moderate these associations. Given the  
16 increasing recognition of sleep and mental health as two inextricably linked aspects of  
17 health <sup>49</sup>, the current findings lay the foundation for more complex model testing to  
18 examine the likely bidirectional and interactive effects between social media use, sleep,  
19 mental health and other associated measures, such as school performance. Applying this  
20 approach to longitudinal and experimental data will be particularly valuable to elucidate  
21 these complex mechanisms, and to build a more holistic and balanced understanding of  
22 social media's links to both positive and negative aspects of health and wellbeing.  
23  
24  
25  
26  
27  
28  
29  
30  
31  
32  
33  
34  
35  
36  
37  
38  
39  
40

41 In contrast, the association between social media use and nighttime awakenings was only  
42 partly explained by covariates, with very high social media users still 28% more likely to have  
43 frequent difficulties with nighttime awakenings than comparable average users. Social  
44 media notification alerts may disrupt sleep during the night, particularly if users then  
45 respond by re-engaging with social media. Adolescents who use social media more also tend  
46 to have a stronger emotional connection to platforms and experience more fear of missing  
47 out <sup>14 50</sup>. Therefore, it is possible that very high users are more likely to remain vigilant for  
48 incoming social media alerts or to respond to these during the night, increasing arousal and  
49 contributing to difficulties falling asleep again. Further research can focus on this type of  
50 specific social media behaviours during the night, to examine whether they explain the link  
51 between higher overall use and nighttime awakenings. If incoming alerts are indeed mostly  
52  
53  
54  
55  
56  
57  
58  
59  
60

1  
2  
3 responsible, interventions can promote simple practical steps such as setting 'do not  
4 disturb' periods on social media apps.  
5  
6  
7

### 8 **Limitations**

9  
10 These findings should be considered within the limitations of the current study. Given the  
11 broad scope of the UK Millennium Cohort Study, sleep and social media use were measured  
12 using individual questions rather than validated multi-item questionnaires. This limits the  
13 current analyses to a single measure of social media use - defined as the amount of time  
14 spent using social media on a typical day - which does not capture the different experiences  
15 of individual users,<sup>51</sup> for example in terms of content, context, timing and emotional  
16 engagement. Future research should carefully consider a range of measures to provide a  
17 more holistic view of adolescents' experiences of using social media, particularly since  
18 evidence highlights the importance of emotional and cognitive aspects of social media use  
19 for sleep<sup>14 16</sup>. To support future research, there is a clear need to establish *validated*  
20 measurement tools that move beyond hours per day to capture these more nuanced  
21 aspects of social media engagement. This is a key area for future development, as available  
22 tools limit the scope of potential research questions, conclusions and recommendations.  
23 Improved measurement tools moving forward can enhance understanding of the  
24 mechanisms linking social media use and sleep, as well as providing a more balanced view of  
25 both positive and negative impacts of social media experiences.  
26  
27  
28  
29  
30  
31  
32  
33  
34  
35  
36  
37  
38  
39  
40

41 These analyses make use of six available reported sleep parameters from this representative  
42 cohort, which do allow a rounded picture of timing and quality, but future research would  
43 benefit from including validated measures of sleep duration and quality, as well as circadian  
44 preference. The current self-reported sleep measures offer valuable insight into  
45 adolescents' *subjective experience* of sleep, which is one important component of sleep, but  
46 this can diverge from verifiable objective measures of sleep parameters provided by other  
47 methods, such as the gold-standard polysomnography<sup>52 53</sup>. In particular, sleep state  
48 misperception in both good and poor sleepers can result in poor self-report estimates of  
49 sleep onset latency,<sup>53</sup> although these differences in sleep onset latency estimates from self-  
50 report and polysomnography tend to be small<sup>54</sup>. The current analyses therefore contribute  
51 one part of the picture, with a continued need to triangulate insight from multiple  
52  
53  
54  
55  
56  
57  
58  
59  
60

1  
2  
3 methodologies (both subjective and objective) to build a more nuanced, holistic  
4 understanding of adolescent social media use and sleep<sup>52 55</sup>.

5  
6  
7  
8 Furthermore, this study presents cross-sectional data, which precludes conclusions of  
9 causality. Cross-sectional analyses are prevalent in this research area, with calls for  
10 longitudinal and experimental work to enrich current understanding<sup>56 57</sup>. Recent studies on  
11 general technology use have supported bidirectional links between higher technology use  
12 and shorter sleep in adolescents<sup>58</sup>, with evidence that restricting phone access can advance  
13 bedtimes and extend sleep opportunity<sup>59</sup>. Restricting adolescent social media use is likely to  
14 be especially challenging, as this is a developmental period of increasing autonomy during  
15 which peer interactions, belonging and acceptance are highly valued<sup>2</sup>. Therefore, an  
16 important avenue for future research is establishing how best to support young people to  
17 balance these rewarding online social interactions with an appropriate and consistent sleep  
18 schedule, to optimise associated health- and school- outcomes.

19  
20  
21  
22  
23  
24  
25  
26  
27  
28  
29  
30 Finally, we note that research in this area is constantly contending with rapidly evolving  
31 social media platforms and associated norms and expectations for online interactions. This  
32 can be particularly challenging for this type of large national cohort data, which in this case  
33 provides a snapshot of UK adolescents' social media use in 2015.

### 34 35 36 37 38 39 **Conclusions**

40 This study provides robust evidence on associations between social media use and sleep  
41 outcomes, controlling for an extensive range of covariates, in a large nationally  
42 representative sample of UK adolescents. It provides a normative profile of adolescent  
43 social media use and sleep in the UK, which can be used as a baseline to support evidence-  
44 based decision-making policy and practice rather than relying on assumptions around  
45 prevalence of high social media use. The findings indicate statistically and practically  
46 significant associations between social media use and sleep patterns, particularly late sleep  
47 onset. Future research should explore the context and experience of time using social  
48 media, to inform more meaningful discussions around best practice and updating sleep  
49 education and interventions to meet the needs of today's society. Interventions should  
50 focus on addressing delayed sleep onset, by supporting young people to balance online  
51  
52  
53  
54  
55  
56  
57  
58  
59  
60

1  
2  
3 social interactions with an appropriate and consistent sleep schedule that allows sufficient  
4 sleep on school nights, with benefits for health and educational outcomes.  
5  
6  
7  
8  
9  
10  
11  
12  
13  
14  
15  
16  
17  
18  
19  
20  
21  
22  
23  
24  
25  
26  
27  
28  
29  
30  
31  
32  
33  
34  
35  
36  
37  
38  
39  
40  
41  
42  
43  
44  
45  
46  
47  
48  
49  
50  
51  
52  
53  
54  
55  
56  
57  
58  
59  
60

For peer review only

## STATEMENTS RELATING TO THIS MANUSCRIPT

### Acknowledgements

The authors would like to thank A Przybylski and J Lewsey for helpful discussions when planning methodology.

### Statement of competing interests

Competing interests: All authors have completed the ICMJE uniform disclosure form at [www.icmje.org/coi\\_disclosure.pdf](http://www.icmje.org/coi_disclosure.pdf) and declare: no support from any organisation for the submitted work; no financial relationships with any organisations that might have an interest in the submitted work in the previous three years; no other relationships or activities that could appear to have influenced the submitted work.

### Funding statement

This study was funded by an Economic and Social Research Council +3 PhD studentship for HS. The Millennium Cohort Study was funded by the Economic and Social Research Council.

### Contributorship statement

HS designed the study and carried out data analysis. HS, HCW and SB interpreted the findings. HS drafted the manuscript in consultation with HCW. HCW and SB revised the manuscript for important intellectual content. All authors approve the submitted manuscript and agree to be accountable for all aspects of the work.

### Ethics approval

The Millennium Cohort Study Sweep 6 was approved by the London Multicentre Research Ethics Committee (13/LO/1786).

### Data availability statement

Data from the sixth sweep of the Millennium Cohort Study are available on the UK Data Service (DOI: 10.5255/UKDA-SN-8156-4).

### Patient and Public Involvement

The public were not involved in designing this secondary data analysis or writing this manuscript.

**Transparency statement**

The lead author and guarantor, Holly Scott, affirms that this manuscript is an honest, accurate, and transparent account of the study being reported; that no important aspects of the study have been omitted; and that any discrepancies from the study as planned have been explained.

**Dissemination declaration**

This work presents secondary analysis of data deposited in the UK Data Service. It is therefore not possible for the authors to share the current findings directly with original study participants.

**Exclusive licence**

The Corresponding Author, Holly Scott, has the right to grant on behalf of all authors and does grant on behalf of all authors, a worldwide licence to the Publishers and its licensees in perpetuity, in all forms, formats and media (whether known now or created in the future), to i) publish, reproduce, distribute, display and store the Contribution, ii) translate the Contribution into other languages, create adaptations, reprints, include within collections and create summaries, extracts and/or, abstracts of the Contribution, iii) create any other derivative work(s) based on the Contribution, iv) to exploit all subsidiary rights in the Contribution, v) the inclusion of electronic links from the Contribution to third party material where-ever it may be located; and, vi) licence any third party to do any or all of the above.



## REFERENCES

1. UK House of Commons. Written evidence submitted by the Royal College of Paediatrics and Child Health (SMH0156). In: Science and Technology Committee, ed. UK, 2018.
2. Blakemore S-J. Avoiding Social Risk in Adolescence. *Current Directions in Psychological Science* 2018;27(2):116-22. doi: 10.1177/0963721417738144
3. Gruber R, Wiebe ST, Wells SA, et al. Sleep and academic success: mechanisms, empirical evidence, and interventional strategies. *Adolescent medicine: state of the art reviews* 2010;21(3):522-41, x. [published Online First: 2011/02/10]
4. Perry GS, Patil SP, Presley-Cantrell LR. Raising awareness of sleep as a healthy behavior. *Prev Chronic Dis* 2013;10:E133-E33. doi: 10.5888/pcd10.130081
5. Walker M. Why we sleep: The new science of sleep and dreams. London: Penguin UK 2018.
6. Owens J. Insufficient Sleep in Adolescents and Young Adults: An Update on Causes and Consequences. *Pediatrics* 2014;134(3):E921-E32. doi: 10.1542/peds.2014-1696
7. Gradisar M, Wolfson AR, Harvey AG, et al. The sleep and technology use of Americans: findings from the National Sleep Foundation's 2011 Sleep in America poll. *Journal of clinical sleep medicine : JCSM : official publication of the American Academy of Sleep Medicine* 2013;9(12):1291-9. doi: 10.5664/jcsm.3272 [published Online First: 2013/12/18]
8. Eaton DK, McKnight-Eily LR, Lowry R, et al. Prevalence of Insufficient, Borderline, and Optimal Hours of Sleep Among High School Students – United States, 2007. *J Adolescent Health* 2010;46(4):399-401. doi: <https://doi.org/10.1016/j.jadohealth.2009.10.011>
9. Cain N, Gradisar M. Electronic media use and sleep in school-aged children and adolescents: A review. *Sleep Med* 2010;11(8):735-42. doi: 10.1016/j.sleep.2010.02.006
10. Vernon L, Barber BL, Modecki KL. Adolescent Problematic Social Networking and School Experiences: The Mediating Effects of Sleep Disruptions and Sleep Quality. *CyberPsychology, Behavior & Social Networking* 2015;18(7):386-92. doi: 10.1089/cyber.2015.0107
11. Przybylski AK. Digital Screen Time and Pediatric Sleep: Evidence from a Preregistered Cohort Study. *The Journal of Pediatrics* 2018 doi: 10.1016/j.jpeds.2018.09.054
12. Hale L, Guan S. Screen time and sleep among school-aged children and adolescents: a systematic literature review. *Sleep Med Rev* 2015;21:50-8. doi: 10.1016/j.smrv.2014.07.007 [published Online First: 2014/09/07]
13. Scott H, Biello S, Woods HC. Identifying drivers for bedtime social media use despite sleep costs: the adolescent perspective. . 12 Oct 2018 12 October 2018. <https://doi.org/10.31234/osf.io/2xb36>.
14. Scott H, Woods HC. Fear of missing out and sleep: Cognitive behavioural factors in adolescents' nighttime social media use. *Journal of Adolescence* 2018;68:61-65. doi: <https://doi.org/10.1016/j.adolescence.2018.07.009>
15. Arora T, Broglia E, Thomas GN, et al. Associations between specific technologies and adolescent sleep quantity, sleep quality, and parasomnias. *Sleep Med* 2014;15(2):240-47. doi: <https://doi.org/10.1016/j.sleep.2013.08.799>

16. Woods HC, Scott H. #Sleepyteens: Social media use in adolescence is associated with poor sleep quality, anxiety, depression and low self-esteem. *J Adolesc* 2016;51:41-9. doi: 10.1016/j.adolescence.2016.05.008
17. Levenson JC, Shensa A, Sidani JE, et al. Social media use before bed and sleep disturbance among young adults in the United States: a nationally representative study. *Sleep* 2017;40(9):zsx113-zsx13. doi: 10.1093/sleep/zsx113
18. Chang A-M, Aeschbach D, Duffy JF, et al. Evening use of light-emitting eReaders negatively affects sleep, circadian timing, and next-morning alertness. *Proceedings of the National Academy of Sciences* 2015;112(4):1232-37. doi: 10.1073/pnas.1418490112
19. Harbard E, Allen NB, Trinder J, et al. What's Keeping Teenagers Up? Prebedtime Behaviors and Actigraphy-Assessed Sleep Over School and Vacation. *J Adolescent Health* 2016;58(4):426-32. doi: 10.1016/j.jadohealth.2015.12.011
20. An J, Sun Y, Wan Y, et al. Associations between problematic internet use and adolescents' physical and psychological symptoms: possible role of sleep quality. *Journal of addiction medicine* 2014;8(4):282-7. doi: 10.1097/adm.000000000000026 [published Online First: 2014/07/16]
21. Levenson JC, Shensa A, Sidani JE, et al. The association between social media use and sleep disturbance among young adults. *Prev Med* 2016;85:36-41. doi: 10.1016/j.ypmed.2016.01.001
22. Pew Research Center. Social Media Use in 2018, March 2018.
23. Centre for Longitudinal Studies. Millennium Cohort Study Sixth Sweep (MCS6): Technical Report: UCL Institute of Education, 2017.
24. Goodman R. Psychometric Properties of the Strengths and Difficulties Questionnaire. *Journal of the American Academy of Child & Adolescent Psychiatry* 2001;40(11):1337-45. doi: 10.1097/00004583-200111000-00015
25. Angold A, Costello EJ, Messer SC, et al. Development of a short questionnaire for use in epidemiological studies of depression in children and adolescents. *International Journal of Methods in Psychiatric Research* 1995;5(4):237-49.
26. Rosenberg M. Society and the adolescent self-image. 1965
27. Lichstein KL, Durrence HH, Taylor DJ, et al. Quantitative criteria for insomnia. *Behav Res Ther* 2003;41(4):427-45. doi: 10.1016/s0005-7967(02)00023-2
28. Espie CA, Kyle SD, Hames P, et al. The Sleep Condition Indicator: a clinical screening tool to evaluate insomnia disorder. *BMJ Open* 2014;4(3) doi: 10.1136/bmjopen-2013-004183
29. srvyr: 'dplyr'-like syntax for summary statistics of survey data. [program]. 0.3.0 version, 2018.
30. Lumley T. Analysis of Complex Survey Samples. *2004* 2004;9(8):19. doi: 10.18637/jss.v009.i08 [published Online First: 2004-01-08]
31. survey: analysis of complex survey samples [program]. 3.32 version, 2017.
32. Sterne JAC, White IR, Carlin JB, et al. Multiple imputation for missing data in epidemiological and clinical research: potential and pitfalls. *BMJ* 2009;338 doi: 10.1136/bmj.b2393
33. van Buuren S, Groothuis-Oudshoorn K. mice: Multivariate Imputation by Chained Equations in R. *J Stat Softw* 2011;45(3):1-67.

- 1
- 2
- 3
- 4 34. Zhang J, Yu KF. What's the relative risk? A method of correcting the odds ratio in cohort
- 5 studies of common outcomes. *Jama* 1998;280(19):1690-1. [published Online First:
- 6 1998/12/01]
- 7 35. Pew Research Center. Teens' social media habits and experiences, November 2018.
- 8 36. Herring SC, Kapidzic S. Teens, Gender, and Self-Presentation in Social Media. In: Wright
- 9 JD, ed. *International Encyclopedia of the Social & Behavioral Sciences* (Second
- 10 Edition). Oxford: Elsevier 2015:146-52.
- 11 37. Galland BC, Short MA, Terrill P, et al. Establishing normal values for pediatric nighttime
- 12 sleep measured by actigraphy: a systematic review and meta-analysis. *Sleep*
- 13 2018;41(4) doi: 10.1093/sleep/zsy017 [published Online First: 2018/03/29]
- 14 38. Hysing M, Pallesen S, Stormark KM, et al. Sleep patterns and insomnia among
- 15 adolescents: a population-based study. *J Sleep Res* 2013;22(5):549-56. doi:
- 16 10.1111/jsr.12055 [published Online First: 2013/04/25]
- 17 39. Kuss DJ, Griffiths MD. Online Social Networking and Addiction—A Review of the
- 18 Psychological Literature. *International Journal of Environmental Research and Public*
- 19 *Health* 2011;8(9) doi: 10.3390/ijerph8093528
- 20 40. Przybylski AK, Weinstein N. A Large-Scale Test of the Goldilocks Hypothesis: Quantifying
- 21 the Relations Between Digital-Screen Use and the Mental Well-Being of Adolescents.
- 22 *Psychological Science* 2017;28(2):204-15. doi: 10.1177/0956797616678438
- 23 41. Asarnow LD, McGlinchey E, Harvey AG. The effects of bedtime and sleep duration on
- 24 academic and emotional outcomes in a nationally representative sample of
- 25 adolescents. *The Journal of adolescent health : official publication of the Society for*
- 26 *Adolescent Medicine* 2014;54(3):350-6. doi: 10.1016/j.jadohealth.2013.09.004
- 27 [published Online First: 2013/11/15]
- 28 42. Exelmans L, Van den Bulck J. Bedtime, shuteye time and electronic media: sleep
- 29 displacement is a two-step process. *J Sleep Res* 2017;26(3):364-70. doi:
- 30 10.1111/jsr.12510
- 31 43. Carskadon MA. Sleep in adolescents: the perfect storm. *Pediatric clinics of North*
- 32 *America* 2011;58(3):637-47. doi: 10.1016/j.pcl.2011.03.003
- 33 44. Roenneberg T, Kuehne T, Pramstaller PP, et al. A marker for the end of adolescence.
- 34 *Current Biology* 2004;14(24):R1038-R39. doi:
- 35 <http://dx.doi.org/10.1016/j.cub.2004.11.039>
- 36 45. Owens J, Drobnich D, Baylor A, et al. School Start Time Change: An In-Depth Examination
- 37 of School Districts in the United States. *Mind, Brain, and Education* 2014;8(4):182-
- 38 213. doi: 10.1111/mbe.12059
- 39 46. Espinoza G, Juvonen J. The Pervasiveness, Connectedness, and Intrusiveness of Social
- 40 Network Site Use Among Young Adolescents. *Cyberpsych Beh Soc N*
- 41 2011;14(12):705-09. doi: 10.1089/cyber.2010.0492
- 42 47. Davis K. Friendship 2.0: adolescents' experiences of belonging and self-disclosure online.
- 43 *J Adolesc* 2012;35(6):1527-36. doi: 10.1016/j.adolescence.2012.02.013
- 44 48. Davis K. Young people's digital lives: The impact of interpersonal relationships and digital
- 45 media use on adolescents' sense of identity. *Computers in Human Behavior*
- 46 2013;29(6):2281-93. doi: <https://doi.org/10.1016/j.chb.2013.05.022>
- 47 49. Reynolds CF, 3rd, O'Hara R. DSM-5 sleep-wake disorders classification: overview for use
- 48 in clinical practice. *The American journal of psychiatry* 2013;170(10):1099-101. doi:
- 49 10.1176/appi.ajp.2013.13010058 [published Online First: 2013/10/03]
- 50
- 51
- 52
- 53
- 54
- 55
- 56
- 57
- 58
- 59
- 60

- 1
- 2
- 3
- 4 50. Przybylski AK, Murayama K, DeHaan CR, et al. Motivational, emotional, and behavioral
- 5 correlates of fear of missing out. *Computers in Human Behavior* 2013;29(4):1841-48.
- 6 doi: 10.1016/j.chb.2013.02.014
- 7
- 8 51. Fox J, Moreland JJ. The dark side of social networking sites: An exploration of the
- 9 relational and psychological stressors associated with Facebook use and affordances.
- 10 *Computers in Human Behavior* 2015;45:168-76. doi: 10.1016/j.chb.2014.11.083
- 11
- 12 52. Tubbs AS, Dollish HK, Fernandez F, et al. Chapter 1 - The basics of sleep physiology and
- 13 behavior. In: Grandner MA, ed. *Sleep and Health: Academic Press* 2019:3-10.
- 14
- 15 53. Fernandez-Mendoza J, Calhoun SL, Bixler EO, et al. Sleep misperception and chronic
- 16 insomnia in the general population: role of objective sleep duration and
- 17 psychological profiles. *Psychosomatic medicine* 2011;73(1):88-97. doi:
- 18 10.1097/PSY.0b013e3181fe365a [published Online First: 2010/10/28]
- 19
- 20 54. Silva GE, Goodwin JL, Sherrill DL, et al. Relationship between reported and measured
- 21 sleep times: the sleep heart health study (SHHS). *Journal of clinical sleep medicine :*
- 22 *JCSM : official publication of the American Academy of Sleep Medicine* 2007;3(6):622-
- 23 30.
- 24
- 25 55. Gregory AM, Sadeh A. Sleep, emotional and behavioral difficulties in children and
- 26 adolescents. *Sleep Med Rev* 2012;16(2):129-36. doi:
- 27 <https://doi.org/10.1016/j.smr.2011.03.007>
- 28
- 29 56. Bartel K, Gradisar M. New Directions in the Link Between Technology Use and Sleep in
- 30 Young People. In: Nevšimalová S, Bruni O, eds. *Sleep Disorders in Children*. Cham:
- 31 Springer International Publishing 2017:69-80.
- 32
- 33 57. Bhat S, Pinto-Zipp G, Upadhyay H, et al. "To sleep, perchance to tweet": in-bed
- 34 electronic social media use and its associations with insomnia, daytime sleepiness,
- 35 mood, and sleep duration in adults. *Sleep Health* 2018;4(2):166-73. doi:
- 36 <https://doi.org/10.1016/j.sleh.2017.12.004>
- 37
- 38 58. Mazzer K, Bauducco S, Linton SJ, et al. Longitudinal associations between time spent
- 39 using technology and sleep duration among adolescents. *J Adolesc* 2018;66:112-19.
- 40 doi: 10.1016/j.adolescence.2018.05.004 [published Online First: 2018/05/31]
- 41
- 42 59. Bartel K, Scheeren R, Gradisar M. Altering Adolescents' Pre-Bedtime Phone Use to
- 43 Achieve Better Sleep Health. *Health Communication* 2018:1-7. doi:
- 44 10.1080/10410236.2017.1422099
- 45
- 46
- 47
- 48
- 49
- 50
- 51
- 52
- 53
- 54
- 55
- 56
- 57
- 58
- 59
- 60

# Supplementary Materials

## Full breakdown of sleep patterns

**Supplementary Table 1.** Typical sleep onset (school days) for males & females

| Typical sleep onset on school days | Male |      | Female |      | Total |      |
|------------------------------------|------|------|--------|------|-------|------|
|                                    | %    | n    | %      | n    | %     | n    |
| Before 9 pm                        | 5.8  | 288  | 4.7    | 248  | 5.2   | 536  |
| 9 - 9:59 pm                        | 28.5 | 1619 | 30.0   | 1681 | 29.2  | 3300 |
| 10 - 10:59 pm                      | 40.2 | 2352 | 38.8   | 2284 | 39.5  | 4636 |
| 11 pm - midnight                   | 18.7 | 1076 | 20.3   | 1220 | 19.5  | 2296 |
| After midnight                     | 6.9  | 366  | 6.1    | 335  | 6.5   | 701  |

Notes: percentages account for survey design and weights.

**Supplementary Table 2.** Typical sleep onset (free days) for males & females

| Typical sleep onset on free days | Male |      | Female |      | Total |      |
|----------------------------------|------|------|--------|------|-------|------|
|                                  | %    | n    | %      | n    | %     | n    |
| Before 9 pm                      | 0.9  | 53   | 0.9    | 45   | 0.9   | 98   |
| 9 - 9:59 pm                      | 6.0  | 328  | 5.4    | 299  | 5.7   | 627  |
| 10 - 10:59 pm                    | 22.8 | 1311 | 24.4   | 1407 | 23.6  | 2718 |
| 11 pm - midnight                 | 35.1 | 2044 | 37.2   | 2208 | 36.1  | 4252 |
| After midnight                   | 35.2 | 1969 | 32.1   | 1808 | 33.7  | 3777 |

Notes: percentages account for survey design and weights. Gender difference in sleep onset (free days)  $p < .05$ .

**Supplementary Table 3.** Typical wake time (school days) for males & females

| Typical wake time on school days | Male |      | Female |      | Total |      |
|----------------------------------|------|------|--------|------|-------|------|
|                                  | %    | n    | %      | n    | %     | n    |
| Before 6 am                      | 4.4  | 220  | 4.5    | 230  | 4.5   | 450  |
| 6 - 6:59 am                      | 37.0 | 1995 | 47.9   | 2609 | 42.2  | 4604 |
| 7 - 7:59 am                      | 53.3 | 3205 | 44.9   | 2771 | 49.3  | 5976 |
| 8 - 8:59 am                      | 4.0  | 247  | 2.1    | 130  | 3.1   | 377  |
| After 9 am                       | 1.3  | 42   | 0.6    | 32   | 1.0   | 74   |

Notes: percentages account for survey design and weights. Gender difference in wake time (school days)  $p < .001$ .

**Supplementary Table 4.** Typical wake time (free days) for males & females

| Typical wake time on free days | Male |      | Female |      | Total |      |
|--------------------------------|------|------|--------|------|-------|------|
|                                | %    | n    | %      | n    | %     | n    |
| Before 8 am                    | 9.9  | 545  | 6.4    | 342  | 8.2   | 887  |
| 8 - 8:59 am                    | 17.1 | 940  | 15.6   | 846  | 16.3  | 1786 |
| 9 - 9:59 am                    | 22.9 | 1348 | 26.5   | 1537 | 24.6  | 2885 |
| 10 - 10:59 am                  | 27.6 | 1628 | 30.2   | 1763 | 28.8  | 3391 |
| 11 - 11:59 am                  | 14.8 | 836  | 15.3   | 934  | 15.0  | 1770 |
| After midday                   | 7.8  | 401  | 6.2    | 348  | 7.0   | 749  |

Notes: percentages account for survey design and weights. Gender difference in wake time (free days)  $p < .001$ .

**Supplementary Table 5.** Typical sleep onset latency for males & females

| Typical sleep onset latency | Male |      | Female |      | Total |      |
|-----------------------------|------|------|--------|------|-------|------|
|                             | %    | n    | %      | n    | %     | n    |
| 0 - 15 minutes              | 37.1 | 2104 | 29.3   | 1709 | 33.3  | 3813 |
| 16 - 30 minutes             | 31.4 | 1838 | 33.7   | 1963 | 32.6  | 3801 |
| 31 - 45 minutes             | 14.8 | 819  | 17.3   | 973  | 16.0  | 1792 |
| 46 - 60 minutes             | 6.4  | 383  | 8.7    | 495  | 7.5   | 878  |
| More than 60 minutes        | 10.3 | 516  | 11.0   | 610  | 10.6  | 1126 |

Notes: percentages account for survey design and weights. Gender difference in sleep onset latency  $p < .001$ .

**Supplementary Table 6.** Frequency of nighttime awakenings for males & females

| Frequency of nighttime awakenings | Male |      | Female |      | Total |      |
|-----------------------------------|------|------|--------|------|-------|------|
|                                   | %    | n    | %      | n    | %     | n    |
| None of the time                  | 35.8 | 2050 | 24.1   | 1435 | 30.1  | 3485 |
| A little of the time              | 32.8 | 1951 | 32.7   | 1966 | 32.8  | 3917 |
| Some of the time                  | 14.5 | 831  | 17.6   | 991  | 16.0  | 1822 |
| A good bit of the time            | 7.0  | 380  | 10.7   | 583  | 8.8   | 963  |
| Most of the time                  | 6.7  | 337  | 10.7   | 554  | 8.6   | 891  |
| All of the time                   | 3.1  | 143  | 4.3    | 226  | 3.7   | 369  |

Notes: percentages account for survey design and weights. Gender difference in nighttime awakenings  $p < .001$ .

## Social media use by demographics

Table 1 in the main text provides a breakdown of social media use by gender. Supplementary tables 7 and 8 provide a breakdown of social media use by additional demographics: household income and ethnic minority status.

**Supplementary Table 7.** Social media use by household equivalised income

|                                             |                      | Social media use |                      |                   |                   | Total n |
|---------------------------------------------|----------------------|------------------|----------------------|-------------------|-------------------|---------|
|                                             |                      | Low<br><1 h      | Average<br>1 to <3 h | High<br>3 to <5 h | Very high<br>5+ h |         |
| <b>Household<br/>equivalized<br/>income</b> | Quintile 1 (lowest)  | 33.9             | 28.7                 | 11.3              | 26.1              | 2038    |
|                                             | Quintile 2           | 30.6             | 29.2                 | 16.3              | 23.9              | 2008    |
|                                             | Quintile 3           | 31.6             | 30.3                 | 15.2              | 22.9              | 2414    |
|                                             | Quintile 4           | 32.4             | 35.8                 | 14.0              | 17.9              | 2727    |
|                                             | Quintile 5 (highest) | 40.0             | 33.8                 | 12.7              | 13.6              | 2685    |

Notes: Numbers represent row percentages (e.g. 33.9% of cohort members in lowest income quintile were low social media users). Percentages account for survey design and weights. Income difference in social media use  $p < .001$ .

**Supplementary Table 8.** Social media use by ethnicity

|                  |           | Social media use |                      |                   |                   | Total n |
|------------------|-----------|------------------|----------------------|-------------------|-------------------|---------|
|                  |           | Low<br><1 h      | Average<br>1 to <3 h | High<br>3 to <5 h | Very high<br>5+ h |         |
| <b>Ethnicity</b> | White     | 32.9             | 31.7                 | 14.4              | 21.1              | 9086    |
|                  | Non-white | 37.3             | 31.4                 | 11.9              | 19.4              | 2326    |

Notes: Numbers represent row percentages (e.g. 32.9% of White cohort members were low social media users). Percentages account for survey design and weights. Ethnicity difference in social media use  $p < .05$ .

## Survey questions

About what time do you usually **go to sleep** on a **school night**?

- 1 Before 9 pm
- 2 9 - 9:59 pm
- 3 10 – 10:59 pm
- 4 11 - midnight
- 5 After midnight

About what time do you usually **wake up** in the morning on a **school day**?

- 1 Before 6 am
- 2 6 - 6:59 am
- 3 7 – 7:59 am
- 4 8 - 8:59 am
- 5 After 9 am

About what time do you usually **go to sleep** on the nights when you **do not have school** the next day?

- 1 Before 9 pm
- 2 9 - 9:59 pm
- 3 10 - 10:59 pm
- 4 11 - midnight
- 5 After midnight

About what time do you **wake up** in the morning on the days when you **do not have school**?

- 1 Before 8 am
- 2 8 - 8:59 am
- 3 9 – 9:59 am
- 4 10 - 10:59 am
- 5 11 - 11:59 am
- 6 After Midday

During the last four weeks, how long did it usually take for you to fall asleep?

- 1 0-15 minutes
- 2 16-30 minutes
- 3 31-45 minutes
- 4 46-60 minutes
- 5 More than 60 minutes

During the last four weeks, how often did you awaken during your sleep time and have trouble falling back to sleep again?

- 1 All of the time
- 2 Most of the time
- 3 A good bit of the time
- 4 Some of the time
- 5 A little of the time
- 6 None of the time

On a normal week day during term time, how many hours do you spend on social networking or messaging sites or Apps on the internet such as Facebook, Twitter and WhatsApp?

- 1 None
- 2 Less than half an hour
- 3 Half an hour to less than 1 hour
- 4 1 hour to less than 2 hours
- 5 2 hours to less than 3 hours
- 6 3 hours to less than 5 hours



1  
2 7 5 hours to less than 7 hours  
3 8 7 hours or more  
4  
5  
6  
7  
8  
9  
10  
11  
12  
13  
14  
15  
16  
17  
18  
19  
20  
21  
22  
23  
24  
25  
26  
27  
28  
29  
30  
31  
32  
33  
34  
35  
36  
37  
38  
39  
40  
41  
42  
43  
44  
45  
46  
47  
48  
49  
50  
51  
52  
53  
54  
55  
56  
57  
58  
59  
60

For peer review only

## Figures

**Figure 1.** Odds Ratios of sleep outcomes for low, high & very high daily social media users



Notes: Odds Ratios measure how much higher or lower the odds of a given sleep outcome are for each category of social media user (Low, <1h; High, 3-5h; Very high, 5+h) compared to typical users (1-3h). Odds Ratios and 95% Confidence Intervals greater than 1 indicate higher odds; those below 1 indicate lower odds. Odds Ratios are adjusted to control for: exact age, sex, ethnic minority status, family income, number of siblings in household, presence of both parents, parent age, Strengths and Difficulties score, Mood and Feelings score, self-esteem, general health, social support and physical activity.

STROBE Statement—Checklist of items that should be included in reports of *cross-sectional studies*

|                              | Item No | Recommendation                                                                                                                                                                                               | Page No |
|------------------------------|---------|--------------------------------------------------------------------------------------------------------------------------------------------------------------------------------------------------------------|---------|
| <b>Title and abstract</b>    | 1       | (a) Indicate the study's design with a commonly used term in the title or the abstract                                                                                                                       | 1       |
|                              |         | (b) Provide in the abstract an informative and balanced summary of what was done and what was found                                                                                                          | 2       |
| <b>Introduction</b>          |         |                                                                                                                                                                                                              |         |
| Background/rationale         | 2       | Explain the scientific background and rationale for the investigation being reported                                                                                                                         | 4-6     |
| Objectives                   | 3       | State specific objectives, including any prespecified hypotheses                                                                                                                                             | 5-6     |
| <b>Methods</b>               |         |                                                                                                                                                                                                              |         |
| Study design                 | 4       | Present key elements of study design early in the paper                                                                                                                                                      | 7       |
| Setting                      | 5       | Describe the setting, locations, and relevant dates, including periods of recruitment, exposure, follow-up, and data collection                                                                              | 7       |
| Participants                 | 6       | (a) Give the eligibility criteria, and the sources and methods of selection of participants                                                                                                                  | 7       |
| Variables                    | 7       | Clearly define all outcomes, exposures, predictors, potential confounders, and effect modifiers. Give diagnostic criteria, if applicable                                                                     | 7-8     |
| Data sources/<br>measurement | 8*      | For each variable of interest, give sources of data and details of methods of assessment (measurement). Describe comparability of assessment methods if there is more than one group                         | 7-8     |
| Bias                         | 9       | Describe any efforts to address potential sources of bias                                                                                                                                                    | NA      |
| Study size                   | 10      | Explain how the study size was arrived at                                                                                                                                                                    | 7       |
| Quantitative variables       | 11      | Explain how quantitative variables were handled in the analyses. If applicable, describe which groupings were chosen and why                                                                                 | 8       |
| Statistical methods          | 12      | (a) Describe all statistical methods, including those used to control for confounding                                                                                                                        | 9       |
|                              |         | (b) Describe any methods used to examine subgroups and interactions                                                                                                                                          | NA      |
|                              |         | (c) Explain how missing data were addressed                                                                                                                                                                  | 9       |
|                              |         | (d) If applicable, describe analytical methods taking account of sampling strategy                                                                                                                           | 9       |
|                              |         | (e) Describe any sensitivity analyses                                                                                                                                                                        | 9       |
| <b>Results</b>               |         |                                                                                                                                                                                                              |         |
| Participants                 | 13*     | (a) Report numbers of individuals at each stage of study—eg numbers potentially eligible, examined for eligibility, confirmed eligible, included in the study, completing follow-up, and analysed            | 7       |
|                              |         | (b) Give reasons for non-participation at each stage                                                                                                                                                         | NA      |
|                              |         | (c) Consider use of a flow diagram                                                                                                                                                                           | NA      |
| Descriptive data             | 14*     | (a) Give characteristics of study participants (eg demographic, clinical, social) and information on exposures and potential confounders                                                                     | 8-9     |
|                              |         | (b) Indicate number of participants with missing data for each variable of interest                                                                                                                          | 10      |
| Outcome data                 | 15*     | Report numbers of outcome events or summary measures                                                                                                                                                         | 8-9     |
| Main results                 | 16      | (a) Give unadjusted estimates and, if applicable, confounder-adjusted estimates and their precision (eg, 95% confidence interval). Make clear which confounders were adjusted for and why they were included | 10-12   |

|                          |    |                                                                                                                                                                            |       |
|--------------------------|----|----------------------------------------------------------------------------------------------------------------------------------------------------------------------------|-------|
|                          |    | (b) Report category boundaries when continuous variables were categorized                                                                                                  | 8     |
|                          |    | (c) If relevant, consider translating estimates of relative risk into absolute risk for a meaningful time period                                                           | NA    |
| Other analyses           | 17 | Report other analyses done—eg analyses of subgroups and interactions, and sensitivity analyses                                                                             | NA    |
| <b>Discussion</b>        |    |                                                                                                                                                                            |       |
| Key results              | 18 | Summarise key results with reference to study objectives                                                                                                                   | 13    |
| Limitations              | 19 | Discuss limitations of the study, taking into account sources of potential bias or imprecision. Discuss both direction and magnitude of any potential bias                 | 15-16 |
| Interpretation           | 20 | Give a cautious overall interpretation of results considering objectives, limitations, multiplicity of analyses, results from similar studies, and other relevant evidence | 14-15 |
| Generalisability         | 21 | Discuss the generalisability (external validity) of the study results                                                                                                      | 16    |
| <b>Other information</b> |    |                                                                                                                                                                            |       |
| Funding                  | 22 | Give the source of funding and the role of the funders for the present study and, if applicable, for the original study on which the present article is based              | 17    |

\*Give information separately for exposed and unexposed groups.

**Note:** An Explanation and Elaboration article discusses each checklist item and gives methodological background and published examples of transparent reporting. The STROBE checklist is best used in conjunction with this article (freely available on the Web sites of PLoS Medicine at <http://www.plosmedicine.org/>, Annals of Internal Medicine at <http://www.annals.org/>, and Epidemiology at <http://www.epidem.com/>). Information on the STROBE Initiative is available at [www.strobe-statement.org](http://www.strobe-statement.org).
