# Supplementary material for: Social media use and adolescent sleep patterns: cross-sectional findings from the UK millennium cohort study
Source: PubMed Central journal article supplement (PMC6830469; doi:10.1136/bmjopen-2019-031161), 2019-10-22
Supplement: bmjopen-2019-031161supp001.pdf [file bmjopen-2019-031161supp001.pdf]

## Supplementary Materials

### Full breakdown of sleep patterns

**Supplementary Table 1.** Typical sleep onset (school days) for males & females

| Typical sleep onset on school days | Male |      | Female |      | Total |      |
|------------------------------------|------|------|--------|------|-------|------|
|                                    | %    | n    | %      | n    | %     | n    |
| Before 9 pm                        | 5.8  | 288  | 4.7    | 248  | 5.2   | 536  |
| 9 - 9:59 pm                        | 28.5 | 1619 | 30.0   | 1681 | 29.2  | 3300 |
| 10 - 10:59 pm                      | 40.2 | 2352 | 38.8   | 2284 | 39.5  | 4636 |
| 11 pm - midnight                   | 18.7 | 1076 | 20.3   | 1220 | 19.5  | 2296 |
| After midnight                     | 6.9  | 366  | 6.1    | 335  | 6.5   | 701  |

Notes: percentages account for survey design and weights.

**Supplementary Table 2.** Typical sleep onset (free days) for males & females

| Typical sleep onset on free days | Male |      | Female |      | Total |      |
|----------------------------------|------|------|--------|------|-------|------|
|                                  | %    | n    | %      | n    | %     | n    |
| Before 9 pm                      | 0.9  | 53   | 0.9    | 45   | 0.9   | 98   |
| 9 - 9:59 pm                      | 6.0  | 328  | 5.4    | 299  | 5.7   | 627  |
| 10 - 10:59 pm                    | 22.8 | 1311 | 24.4   | 1407 | 23.6  | 2718 |
| 11 pm - midnight                 | 35.1 | 2044 | 37.2   | 2208 | 36.1  | 4252 |
| After midnight                   | 35.2 | 1969 | 32.1   | 1808 | 33.7  | 3777 |

Notes: percentages account for survey design and weights. Gender difference in sleep onset (free days)  $p < .05$ .

**Supplementary Table 3.** Typical wake time (school days) for males & females

| Typical wake time on school days | Male |      | Female |      | Total |      |
|----------------------------------|------|------|--------|------|-------|------|
|                                  | %    | n    | %      | n    | %     | n    |
| Before 6 am                      | 4.4  | 220  | 4.5    | 230  | 4.5   | 450  |
| 6 - 6:59 am                      | 37.0 | 1995 | 47.9   | 2609 | 42.2  | 4604 |
| 7 - 7:59 am                      | 53.3 | 3205 | 44.9   | 2771 | 49.3  | 5976 |
| 8 - 8:59 am                      | 4.0  | 247  | 2.1    | 130  | 3.1   | 377  |
| After 9 am                       | 1.3  | 42   | 0.6    | 32   | 1.0   | 74   |

Notes: percentages account for survey design and weights. Gender difference in wake time (school days)  $p < .001$ .

**Supplementary Table 4.** Typical wake time (free days) for males & females

| Typical wake time on free days | Male |      | Female |      | Total |      |
|--------------------------------|------|------|--------|------|-------|------|
|                                | %    | n    | %      | n    | %     | n    |
| Before 8 am                    | 9.9  | 545  | 6.4    | 342  | 8.2   | 887  |
| 8 - 8:59 am                    | 17.1 | 940  | 15.6   | 846  | 16.3  | 1786 |
| 9 - 9:59 am                    | 22.9 | 1348 | 26.5   | 1537 | 24.6  | 2885 |
| 10 - 10:59 am                  | 27.6 | 1628 | 30.2   | 1763 | 28.8  | 3391 |
| 11 - 11:59 am                  | 14.8 | 836  | 15.3   | 934  | 15.0  | 1770 |
| After midday                   | 7.8  | 401  | 6.2    | 348  | 7.0   | 749  |

Notes: percentages account for survey design and weights. Gender difference in wake time (free days)  $p < .001$ .

**Supplementary Table 5.** Typical sleep onset latency for males & females

| Typical sleep onset latency | Male |      | Female |      | Total |      |
|-----------------------------|------|------|--------|------|-------|------|
|                             | %    | n    | %      | n    | %     | n    |
| 0 - 15 minutes              | 37.1 | 2104 | 29.3   | 1709 | 33.3  | 3813 |
| 16 - 30 minutes             | 31.4 | 1838 | 33.7   | 1963 | 32.6  | 3801 |
| 31 - 45 minutes             | 14.8 | 819  | 17.3   | 973  | 16.0  | 1792 |
| 46 - 60 minutes             | 6.4  | 383  | 8.7    | 495  | 7.5   | 878  |
| More than 60 minutes        | 10.3 | 516  | 11.0   | 610  | 10.6  | 1126 |

Notes: percentages account for survey design and weights. Gender difference in sleep onset latency  $p < .001$ .

**Supplementary Table 6.** Frequency of nighttime awakenings for males & females

| Frequency of nighttime awakenings | Male |      | Female |      | Total |      |
|-----------------------------------|------|------|--------|------|-------|------|
|                                   | %    | n    | %      | n    | %     | n    |
| None of the time                  | 35.8 | 2050 | 24.1   | 1435 | 30.1  | 3485 |
| A little of the time              | 32.8 | 1951 | 32.7   | 1966 | 32.8  | 3917 |
| Some of the time                  | 14.5 | 831  | 17.6   | 991  | 16.0  | 1822 |
| A good bit of the time            | 7.0  | 380  | 10.7   | 583  | 8.8   | 963  |
| Most of the time                  | 6.7  | 337  | 10.7   | 554  | 8.6   | 891  |
| All of the time                   | 3.1  | 143  | 4.3    | 226  | 3.7   | 369  |

Notes: percentages account for survey design and weights. Gender difference in nighttime awakenings  $p < .001$ .

## Social media use by demographics

Table 1 in the main text provides a breakdown of social media use by gender. Supplementary tables 7 and 8 provide a breakdown of social media use by additional demographics: household income and ethnic minority status.

**Supplementary Table 7.** Social media use by household equivalised income

|                                             |                      | Social media use |                      |                   |                   | Total n |
|---------------------------------------------|----------------------|------------------|----------------------|-------------------|-------------------|---------|
|                                             |                      | Low<br><1 h      | Average<br>1 to <3 h | High<br>3 to <5 h | Very high<br>5+ h |         |
| <b>Household<br/>equivalized<br/>income</b> | Quintile 1 (lowest)  | 33.9             | 28.7                 | 11.3              | 26.1              | 2038    |
|                                             | Quintile 2           | 30.6             | 29.2                 | 16.3              | 23.9              | 2008    |
|                                             | Quintile 3           | 31.6             | 30.3                 | 15.2              | 22.9              | 2414    |
|                                             | Quintile 4           | 32.4             | 35.8                 | 14.0              | 17.9              | 2727    |
|                                             | Quintile 5 (highest) | 40.0             | 33.8                 | 12.7              | 13.6              | 2685    |

Notes: Numbers represent row percentages (e.g. 33.9% of cohort members in lowest income quintile were low social media users). Percentages account for survey design and weights. Income difference in social media use  $p < .001$ .

**Supplementary Table 8.** Social media use by ethnicity

|                  |           | Social media use |                      |                   |                   | Total n |
|------------------|-----------|------------------|----------------------|-------------------|-------------------|---------|
|                  |           | Low<br><1 h      | Average<br>1 to <3 h | High<br>3 to <5 h | Very high<br>5+ h |         |
| <b>Ethnicity</b> | White     | 32.9             | 31.7                 | 14.4              | 21.1              | 9086    |
|                  | Non-white | 37.3             | 31.4                 | 11.9              | 19.4              | 2326    |

Notes: Numbers represent row percentages (e.g. 32.9% of White cohort members were low social media users). Percentages account for survey design and weights. Ethnicity difference in social media use  $p < .05$ .

## Survey questions

About what time do you usually **go to sleep** on a **school night**?

- 1 Before 9 pm
- 2 9 - 9:59 pm
- 3 10 – 10:59 pm
- 4 11 - midnight
- 5 After midnight

About what time do you usually **wake up** in the morning on a **school day**?

- 1 Before 6 am
- 2 6 - 6:59 am
- 3 7 – 7:59 am
- 4 8 - 8:59 am
- 5 After 9 am

About what time do you usually **go to sleep** on the nights when you **do not have school** the next day?

- 1 Before 9 pm
- 2 9 - 9:59 pm
- 3 10 - 10:59 pm
- 4 11 - midnight
- 5 After midnight

About what time do you **wake up** in the morning on the days when you **do not have school**?

- 1 Before 8 am
- 2 8 - 8:59 am
- 3 9 – 9:59 am
- 4 10 - 10:59 am
- 5 11 - 11:59 am
- 6 After Midday

During the last four weeks, how long did it usually take for you to fall asleep?

- 1 0-15 minutes
- 2 16-30 minutes
- 3 31-45 minutes
- 4 46-60 minutes
- 5 More than 60 minutes

During the last four weeks, how often did you awaken during your sleep time and have trouble falling back to sleep again?

- 1 All of the time
- 2 Most of the time
- 3 A good bit of the time
- 4 Some of the time
- 5 A little of the time
- 6 None of the time

On a normal week day during term time, how many hours do you spend on social networking or messaging sites or Apps on the internet such as Facebook, Twitter and WhatsApp?

- 1 None
- 2 Less than half an hour
- 3 Half an hour to less than 1 hour
- 4 1 hour to less than 2 hours
- 5 2 hours to less than 3 hours
- 6 3 hours to less than 5 hours

7 5 hours to less than 7 hours  
8 7 hours or more

## Figures

**Figure 1.** Odds Ratios of sleep outcomes for low, high & very high daily social media users

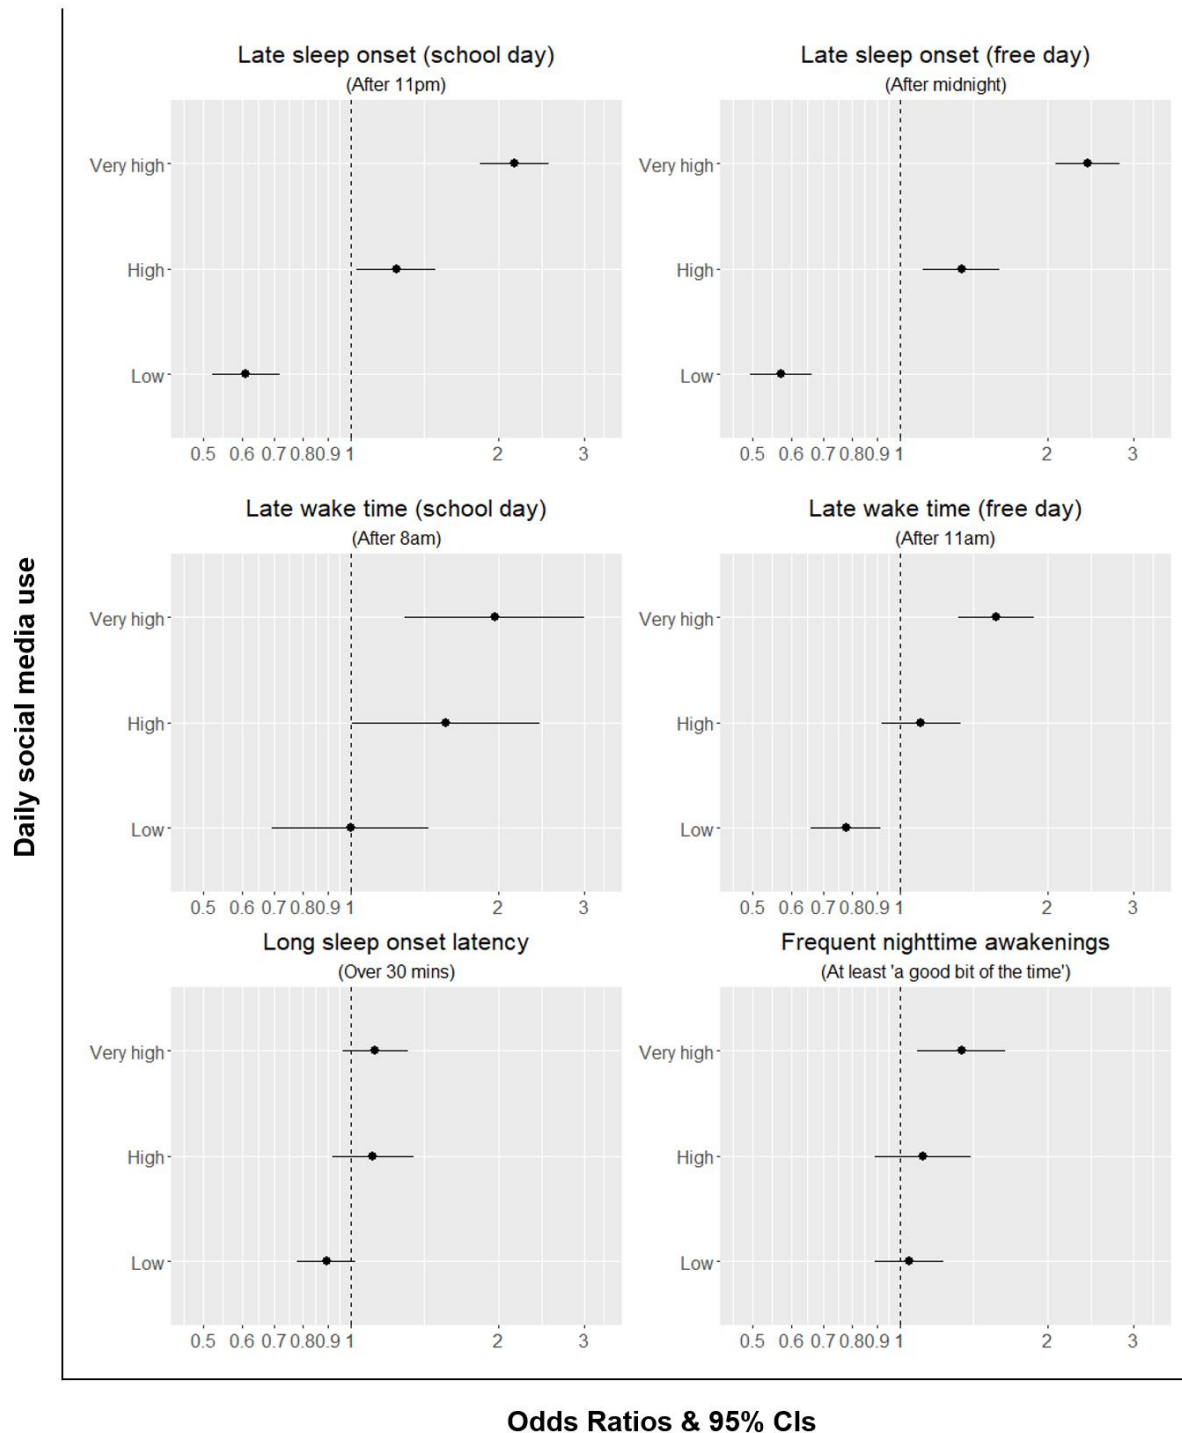

Notes: Odds Ratios measure how much higher or lower the odds of a given sleep outcome are for each category of social media user (Low, <1h; High, 3-5h; Very high, 5+h) compared to typical users (1-3h). Odds Ratios and 95% Confidence Intervals greater than 1 indicate higher odds; those below 1 indicate lower odds. Odds Ratios are adjusted to control for: exact age, sex, ethnic minority status, family income, number of siblings in household, presence of both parents, parent age, Strengths and Difficulties score, Mood and Feelings score, self-esteem, general health, social support and physical activity.
